# Supplementary material
Source: MDPI journal article supplement (https://www.mdpi.com/2413-8851/4/4/69)
Supplement: s1 [file s1]

## Supplementary Materials

### Combined Analysis of Both Areas

**Table S1.** Difference between gendered based perceptions of safety.

| Safety related problem while walking in daily travel area |       |                          |                    |                                  |
|-----------------------------------------------------------|-------|--------------------------|--------------------|----------------------------------|
|                                                           | No    | Yes, during the day only | Yes, at night only | Yes, during the day and at night |
| Male                                                      | 56.5% | 15.3%                    | 11.7%              | 11.1%                            |
| Female                                                    | 60.8% | 12.6%                    | 9.9%               | 12.6%                            |
| Safety related problem in bus stops                       |       |                          |                    |                                  |
| Male                                                      | 56.4% | 15.0%                    | 10.6%              | 11.4%                            |
| Female                                                    | 60.2% | 9.1%                     | 12.9%              | 11.4%                            |
| Safety related problem during bus ride                    |       |                          |                    |                                  |
| Male                                                      | 59.3% | 5.6%                     | 15.3%              | 12.8%                            |
| Female                                                    | 61.7% | 5.8%                     | 14.3%              | 12.0%                            |

**Table S2.** Summary Item Statistics.

|                         | Mean  | Minimum | Maximum | Range | Maximum / Minimum | Variance | N of Items |
|-------------------------|-------|---------|---------|-------|-------------------|----------|------------|
| Item Means              | 4.516 | 2.999   | 5.621   | 2.622 | 1.874             | .500     | 36         |
| Inter-Item Correlations | .121  | -.220   | .733    | .953  | -3.333            | .025     | 36         |

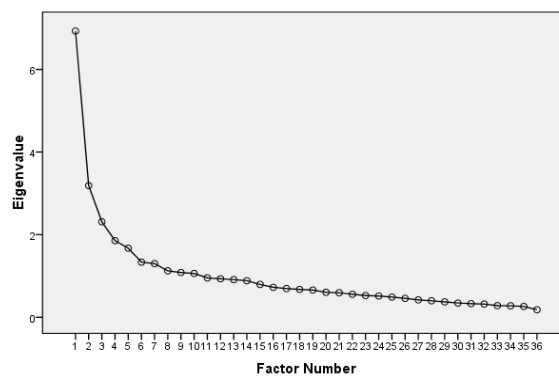

**Figure S1.** Scree plot indicating that the data have 10 factors

Table S3. Total Variance Explained.

| Component | Initial Eigenvalues |               |              | Extraction Sums of Squared Loadings |               |              | Rotation Sums of Squared Loadings |               |              |
|-----------|---------------------|---------------|--------------|-------------------------------------|---------------|--------------|-----------------------------------|---------------|--------------|
|           | Total               | % of Variance | Cumulative % | Total                               | % of Variance | Cumulative % | Total                             | % of Variance | Cumulative % |
| 1         | 6.929               | 19.248        | 19.248       | 6.929                               | 19.248        | 19.248       | 4.419                             | 12.276        | 12.276       |
| 2         | 3.187               | 8.853         | 28.101       | 3.187                               | 8.853         | 28.101       | 3.086                             | 8.571         | 20.847       |
| 3         | 2.310               | 6.416         | 34.517       | 2.310                               | 6.416         | 34.517       | 2.772                             | 7.699         | 28.546       |
| 4         | 1.854               | 5.151         | 39.668       | 1.854                               | 5.151         | 39.668       | 2.580                             | 7.167         | 35.713       |
| 5         | 1.672               | 4.644         | 44.313       | 1.672                               | 4.644         | 44.313       | 1.784                             | 4.957         | 40.669       |
| 6         | 1.335               | 3.707         | 48.020       | 1.335                               | 3.707         | 48.020       | 1.783                             | 4.952         | 45.621       |
| 7         | 1.298               | 3.606         | 51.626       | 1.298                               | 3.606         | 51.626       | 1.512                             | 4.201         | 49.822       |
| 8         | 1.124               | 3.122         | 54.748       | 1.124                               | 3.122         | 54.748       | 1.403                             | 3.896         | 53.718       |
| 9         | 1.083               | 3.007         | 57.755       | 1.083                               | 3.007         | 57.755       | 1.308                             | 3.634         | 57.352       |
| 10        | 1.060               | 2.945         | 60.700       | 1.060                               | 2.945         | 60.700       | 1.205                             | 3.348         | 60.700       |
| 11        | .953                | 2.648         | 63.348       |                                     |               |              |                                   |               |              |
| 12        | .933                | 2.591         | 65.939       |                                     |               |              |                                   |               |              |
| 13        | .911                | 2.530         | 68.468       |                                     |               |              |                                   |               |              |
| 14        | .885                | 2.457         | 70.925       |                                     |               |              |                                   |               |              |
| 15        | .794                | 2.204         | 73.130       |                                     |               |              |                                   |               |              |
| 16        | .725                | 2.013         | 75.143       |                                     |               |              |                                   |               |              |
| 17        | .695                | 1.930         | 77.073       |                                     |               |              |                                   |               |              |
| 18        | .673                | 1.871         | 78.944       |                                     |               |              |                                   |               |              |
| 19        | .659                | 1.830         | 80.774       |                                     |               |              |                                   |               |              |
| 20        | .604                | 1.677         | 82.451       |                                     |               |              |                                   |               |              |
| 21        | .592                | 1.645         | 84.095       |                                     |               |              |                                   |               |              |
| 22        | .556                | 1.545         | 85.641       |                                     |               |              |                                   |               |              |
| 23        | .526                | 1.461         | 87.102       |                                     |               |              |                                   |               |              |
| 24        | .515                | 1.430         | 88.532       |                                     |               |              |                                   |               |              |
| 25        | .488                | 1.356         | 89.888       |                                     |               |              |                                   |               |              |
| 26        | .458                | 1.271         | 91.159       |                                     |               |              |                                   |               |              |
| 27        | .421                | 1.168         | 92.328       |                                     |               |              |                                   |               |              |
| 28        | .399                | 1.108         | 93.436       |                                     |               |              |                                   |               |              |
| 29        | .371                | 1.031         | 94.467       |                                     |               |              |                                   |               |              |
| 30        | .344                | .956          | 95.423       |                                     |               |              |                                   |               |              |
| 31        | .329                | .915          | 96.338       |                                     |               |              |                                   |               |              |
| 32        | .319                | .887          | 97.224       |                                     |               |              |                                   |               |              |
| 33        | .281                | .781          | 98.005       |                                     |               |              |                                   |               |              |
| 34        | .276                | .767          | 98.772       |                                     |               |              |                                   |               |              |
| 35        | .260                | .722          | 99.495       |                                     |               |              |                                   |               |              |
| 36        | .182                | .505          | 100.000      |                                     |               |              |                                   |               |              |

Extraction Method: Principal Component Analysis.

**Table S4.** Coefficients<sup>a</sup>.

| Model |                                                | Collinearity Statistics |       |
|-------|------------------------------------------------|-------------------------|-------|
|       |                                                | Tolerance               | VIF   |
| 1     | Use of carpool to work                         | .483                    | 2.072 |
|       | Use of home as workplace or work from home     | .435                    | 2.301 |
|       | Whether use public transit or not              | .904                    | 1.106 |
|       | A-R factor score 1 for analysis 1              | .825                    | 1.211 |
|       | A-R factor score 2 for analysis 1              | .823                    | 1.216 |
|       | A-R factor score 3 for analysis 1              | .876                    | 1.141 |
|       | A-R factor score 4 for analysis 1              | .896                    | 1.116 |
|       | A-R factor score 5 for analysis 1              | .934                    | 1.071 |
|       | A-R factor score 6 for analysis 1              | .871                    | 1.148 |
|       | A-R factor score 7 for analysis 1              | .881                    | 1.136 |
|       | A-R factor score 8 for analysis 1              | .875                    | 1.143 |
|       | A-R factor score 9 for analysis 1              | .813                    | 1.231 |
|       | A-R factor score 10 for analysis 1             | .922                    | 1.085 |
|       | Occupation: Unemployed                         | .187                    | 5.357 |
|       | Income level: 15000–30000 BDT                  | .727                    | 1.375 |
|       | Age category of 25–34 years                    | .824                    | 1.214 |
|       | Employment status: Not employed                | .160                    | 6.253 |
|       | Occupation: Govt_service                       | .767                    | 1.304 |
|       | Income level of more than 75000 BDT            | .844                    | 1.184 |
|       | Average daily distance traveled during weekday | .604                    | 1.655 |
|       | Average daily trip duration during weekday     | .580                    | 1.724 |

|                                            |      |       |
|--------------------------------------------|------|-------|
| Average daily travel cost during weekday   | .774 | 1.291 |
| 18 to 20 years of age                      | .615 | 1.627 |
| Greater than and equals to 65 years of age | .815 | 1.227 |
| educational level primary                  | .936 | 1.069 |
| educational level HSC                      | .725 | 1.379 |
| educational level higher                   | .936 | 1.068 |
| Occupation private service                 | .595 | 1.681 |
| Occupation retired                         | .717 | 1.395 |
| income less than 15k                       | .660 | 1.516 |
| marital status unmarried                   | .605 | 1.654 |
| marital status widowed/divorced            | .906 | 1.103 |
| Gender: female                             | .629 | 1.590 |

a. Dependent Variable: individual weekday activity space in sq. mile

Table S5. Coefficients<sup>a</sup>.

| Model |                                            | Unstandardized Coefficients |            | Standardized Coefficients | t      | Sig. | 95.0% Confidence Interval for B |             |
|-------|--------------------------------------------|-----------------------------|------------|---------------------------|--------|------|---------------------------------|-------------|
|       |                                            | B                           | Std. Error | Beta                      |        |      | Lower Bound                     | Upper Bound |
| 1     | (Constant)                                 | 1.235                       | .242       |                           | 5.101  | .000 | .759                            | 1.710       |
|       | Gender of the respondent                   | -.077                       | .131       | -.026                     | -.589  | .556 | -.334                           | .180        |
|       | Use of carpool to work                     | 7.671E-5                    | .002       | .002                      | .031   | .975 | -.005                           | .005        |
|       | Use of home as workplace or work from home | .002                        | .003       | .030                      | .582   | .561 | -.004                           | .007        |
|       | Whether use public transit or not          | .002                        | .004       | .025                      | .664   | .507 | -.005                           | .010        |
|       | A-R factor score 1 for analysis 1          | -.035                       | .053       | -.026                     | -.657  | .511 | -.140                           | .070        |
|       | A-R factor score 2 for analysis 1          | .062                        | .054       | .045                      | 1.148  | .251 | -.044                           | .168        |
|       | A-R factor score 3 for analysis 1          | .099                        | .052       | .071                      | 1.883  | .060 | -.004                           | .202        |
|       | A-R factor score 4 for analysis 1          | -.038                       | .050       | -.028                     | -.756  | .450 | -.137                           | .061        |
|       | A-R factor score 5 for analysis 1          | -.005                       | .052       | -.003                     | -.091  | .928 | -.106                           | .097        |
|       | A-R factor score 6 for analysis 1          | -.072                       | .054       | -.051                     | -1.339 | .181 | -.179                           | .034        |
|       | A-R factor score 7 for analysis 1          | -.045                       | .052       | -.033                     | -.875  | .382 | -.147                           | .056        |
|       | A-R factor score 8 for analysis 1          | .040                        | .056       | .027                      | .712   | .476 | -.070                           | .151        |
|       | A-R factor score 9 for analysis 1          | -.063                       | .055       | -.045                     | -1.144 | .253 | -.170                           | .045        |
|       | A-R factor score 10 for analysis 1         | -.011                       | .052       | -.008                     | -.210  | .834 | -.113                           | .091        |
|       | Occupation: Unemployed                     | -.049                       | .165       | -.015                     | -.296  | .767 | -.372                           | .275        |
|       | Income level: 15000–30000 BDT              | .179                        | .152       | .049                      | 1.177  | .240 | -.120                           | .479        |
|       | Age category of 25–34 years                | -.153                       | .120       | -.050                     | -1.275 | .203 | -.389                           | .083        |
|       | Occupation: Govt_service                   | .088                        | .205       | .017                      | .428   | .669 | -.315                           | .491        |
|       | Income level of more than 75000 BDT        | -.058                       | .196       | -.012                     | -.299  | .765 | -.443                           | .326        |
|       | 18 to 20 years of age                      | -.703                       | .290       | -.109                     | -2.419 | .016 | -1.273                          | -.132       |
|       | Greater than and equals to 65 years of age | .020                        | .513       | .002                      | .039   | .969 | -.988                           | 1.028       |

|                                                   |       |      |       |        |      |        |       |
|---------------------------------------------------|-------|------|-------|--------|------|--------|-------|
| educational level primary                         | -.665 | .448 | -.054 | -1.482 | .139 | -1.545 | .216  |
| educational level HSC                             | -.235 | .163 | -.060 | -1.446 | .149 | -.555  | .084  |
| educational level higher                          | .037  | .280 | .005  | .133   | .894 | -.513  | .587  |
| Occupation private service                        | .050  | .135 | .017  | .371   | .711 | -.215  | .315  |
| Occupation retired                                | -.102 | .360 | -.011 | -.284  | .777 | -.809  | .604  |
| income less than 15k                              | .507  | .193 | .115  | 2.622  | .009 | .127   | .887  |
| marital status unmarried                          | -.215 | .142 | -.069 | -1.517 | .130 | -.494  | .063  |
| marital status<br>widowed/divorced                | .267  | .526 | .019  | .508   | .612 | -.766  | 1.300 |
| Average daily distance<br>traveled during weekday | -.007 | .003 | -.131 | -2.865 | .004 | -.012  | -.002 |
| Average daily trip duration<br>during weekday     | .009  | .001 | .516  | 11.083 | .000 | .007   | .010  |
| Average daily travel cost<br>during weekday       | .000  | .000 | -.050 | -1.248 | .212 | -.001  | .000  |

a. Dependent Variable: individual weekday activity space in sq. mile

**Table S6. Coefficients<sup>a</sup>.**

| Model |                                            | Collinearity Statistics |       |
|-------|--------------------------------------------|-------------------------|-------|
|       |                                            | Tolerance               | VIF   |
| 1     | Use of carpool to work                     | .594                    | 1.683 |
|       | Use of home as workplace or work from home | .543                    | 1.841 |
|       | Whether use public transit or not          | .809                    | 1.236 |
|       | A-R factor score 1 for analysis 1          | .809                    | 1.237 |
|       | A-R factor score 2 for analysis 1          | .844                    | 1.184 |
|       | A-R factor score 3 for analysis 1          | .903                    | 1.107 |
|       | A-R factor score 4 for analysis 1          | .875                    | 1.142 |
|       | A-R factor score 5 for analysis 1          | .885                    | 1.129 |
|       | A-R factor score 6 for analysis 1          | .821                    | 1.218 |
|       | A-R factor score 7 for analysis 1          | .890                    | 1.123 |
|       | A-R factor score 8 for analysis 1          | .892                    | 1.121 |
|       | A-R factor score 9 for analysis 1          | .880                    | 1.137 |
|       | A-R factor score 10 for analysis 1         | .860                    | 1.163 |
|       | Occupation: Unemployed                     | .175                    | 5.719 |
|       | Income level: 15000–30000 BDT              | .771                    | 1.297 |
|       | Age category of 25–34 years                | .852                    | 1.173 |
|       | Occupation: Govt_service                   | .739                    | 1.353 |
|       | Income level of more than 75000 BDT        | .815                    | 1.227 |
|       | 18 to 20 years of age                      | .705                    | 1.418 |
|       | Greater than and equals to 65 years of age | .736                    | 1.358 |
|       | educational level primary                  | .933                    | 1.072 |
|       | educational level HSC                      | .768                    | 1.303 |
|       | educational level higher                   | .912                    | 1.097 |

|                                                |      |       |
|------------------------------------------------|------|-------|
| Occupation private service                     | .575 | 1.739 |
| Occupation retired                             | .708 | 1.412 |
| income less than 15k                           | .751 | 1.331 |
| marital status unmarried                       | .707 | 1.414 |
| marital status widowed/divorced                | .937 | 1.067 |
| Gender: female                                 | .740 | 1.351 |
| Employment status: Not employed                | .169 | 5.902 |
| Average daily distance traveled during weekend | .607 | 1.649 |
| Average daily trip duration during weekend     | .614 | 1.628 |
| Average daily travel cost during weekend       | .844 | 1.185 |

a. Dependent Variable: individual weekend activity space in sq. mile



Table S7. Coefficients<sup>a</sup>.

| Model |                                            | Unstandardized Coefficients |            | Standardized Coefficients | t      | Sig. | 95.0% Confidence Interval for B |             |
|-------|--------------------------------------------|-----------------------------|------------|---------------------------|--------|------|---------------------------------|-------------|
|       |                                            | B                           | Std. Error | Beta                      |        |      | Lower Bound                     | Upper Bound |
| 1     | (Constant)                                 | .943                        | .224       |                           | 4.199  | .000 | .502                            | 1.384       |
|       | Gender of the respondent                   | -.178                       | .117       | -.063                     | -1.519 | .129 | -.409                           | .052        |
|       | Use of carpool to work                     | .000                        | .003       | -.004                     | -.077  | .938 | -.005                           | .005        |
|       | Use of home as workplace or work from home | -.005                       | .003       | -.075                     | -1.558 | .120 | -.011                           | .001        |
|       | Whether use public transit or not          | .015                        | .004       | .165                      | 4.119  | .000 | .008                            | .023        |
|       | A-R factor score 1 for analysis 1          | .125                        | .049       | .100                      | 2.539  | .011 | .028                            | .222        |
|       | A-R factor score 2 for analysis 1          | .066                        | .050       | .052                      | 1.322  | .187 | -.032                           | .165        |
|       | A-R factor score 3 for analysis 1          | -.031                       | .051       | -.023                     | -.613  | .540 | -.130                           | .068        |
|       | A-R factor score 4 for analysis 1          | .200                        | .049       | .157                      | 4.091  | .000 | .104                            | .296        |
|       | A-R factor score 5 for analysis 1          | -.005                       | .050       | -.004                     | -.096  | .924 | -.104                           | .094        |
|       | A-R factor score 6 for analysis 1          | .148                        | .055       | .107                      | 2.674  | .008 | .039                            | .257        |
|       | A-R factor score 7 for analysis 1          | -.040                       | .051       | -.030                     | -.789  | .430 | -.141                           | .060        |
|       | A-R factor score 8 for analysis 1          | .114                        | .052       | .084                      | 2.189  | .029 | .012                            | .217        |
|       | A-R factor score 9 for analysis 1          | .139                        | .054       | .099                      | 2.591  | .010 | .034                            | .244        |
|       | A-R factor score 10 for analysis 1         | .015                        | .054       | .011                      | .272   | .786 | -.092                           | .121        |
|       | Occupation: Unemployed                     | -.098                       | .170       | -.030                     | -.578  | .563 | -.432                           | .236        |
|       | Income level: 15000–30000 BDT              | .315                        | .135       | .095                      | 2.331  | .020 | .049                            | .580        |
|       | Age category of 25–34 years                | .110                        | .107       | .040                      | 1.025  | .306 | -.101                           | .321        |
|       | Occupation: Govt_service                   | -.122                       | .175       | -.029                     | -.700  | .485 | -.466                           | .222        |
|       | Income level of more than 75000 BDT        | -.122                       | .191       | -.026                     | -.640  | .523 | -.496                           | .252        |
|       | 18 to 20 years of age                      | .247                        | .349       | .030                      | .708   | .479 | -.439                           | .934        |
|       | Greater than and equals to 65 years of age | -.183                       | .481       | -.016                     | -.380  | .704 | -1.128                          | .762        |

|                                                   |       |      |       |        |      |        |       |
|---------------------------------------------------|-------|------|-------|--------|------|--------|-------|
| educational level primary                         | -.734 | .461 | -.059 | -1.593 | .112 | -1.640 | .172  |
| educational level HSC                             | .054  | .166 | .013  | .327   | .744 | -.272  | .380  |
| educational level higher                          | -.183 | .288 | -.024 | -.635  | .526 | -.750  | .383  |
| Occupation private service                        | .037  | .125 | .014  | .297   | .766 | -.209  | .283  |
| Occupation retired                                | -.113 | .516 | -.009 | -.219  | .827 | -1.127 | .900  |
| income less than 15k                              | -.022 | .178 | -.005 | -.126  | .900 | -.372  | .327  |
| marital status unmarried                          | -.123 | .124 | -.042 | -.985  | .325 | -.367  | .122  |
| marital status<br>widowed/divorced                | .238  | .649 | .014  | .367   | .714 | -1.037 | 1.514 |
| Average daily distance<br>traveled during weekend | .010  | .005 | .087  | 1.886  | .060 | .000   | .021  |
| Average daily trip duration<br>during weekend     | .008  | .001 | .297  | 6.461  | .000 | .005   | .010  |
| Average daily travel cost<br>during weekend       | .001  | .000 | .091  | 2.317  | .021 | .000   | .002  |

a. Dependent Variable: individual weekend activity space in sq. mile

**Table S8. Coefficients<sup>a</sup>.**

| Model |                                                                | Collinearity Statistics |       |
|-------|----------------------------------------------------------------|-------------------------|-------|
|       |                                                                | Tolerance               | VIF   |
| 1     | Number of employed persons in the HH                           | .943                    | 1.060 |
|       | Car ownership status                                           | .904                    | 1.106 |
|       | Number of cars HH use for travel including office vehicles     | .914                    | 1.094 |
|       | number of members surveyed in each HH                          | .859                    | 1.164 |
|       | Intersection count per sq. mile within weekday activity spaces | .689                    | 1.452 |
|       | Job count per sq. mile within weekday activity spaces          | .300                    | 3.338 |
|       | School count per sq. mile within weekday activity spaces       | .287                    | 3.487 |
|       | Shop count per sq. mile within weekday activity spaces         | .526                    | 1.901 |
|       | Number of household members: 2                                 | .834                    | 1.199 |
|       | household size greater than equals to 5                        | .897                    | 1.115 |
|       | ownership of another vehicle bicycle                           | .943                    | 1.060 |
|       | ownership of another vehicle rickshaw                          | .931                    | 1.075 |
|       | Residence count per sq. mile within weekday activity spaces    | .830                    | 1.204 |
|       | Population count per sq. mile within weekday activity spaces   | .546                    | 1.833 |

a. Dependent Variable: weekday activity space in sq. mile

**Table S9. Coefficients<sup>a</sup>**

|   | Model                                                          | Unstandardized Coefficients |            | Standardized Coefficients | t      | Sig. | 95.0% Confidence Interval for B |             |
|---|----------------------------------------------------------------|-----------------------------|------------|---------------------------|--------|------|---------------------------------|-------------|
|   |                                                                | B                           | Std. Error | Beta                      |        |      | Lower Bound                     | Upper Bound |
| 1 | (Constant)                                                     | 5.110                       | .824       |                           | 6.201  | .000 | 3.488                           | 6.732       |
|   | Number of employed persons in the HH                           | .067                        | .321       | .009                      | .208   | .835 | -.565                           | .699        |
|   | Car ownership status                                           | .269                        | .228       | .051                      | 1.178  | .240 | -.180                           | .718        |
|   | Number of cars HH use for travel including office vehicles     | .447                        | .209       | .092                      | 2.142  | .033 | .036                            | .858        |
|   | number of members surveyed in each HH                          | .281                        | .110       | .113                      | 2.566  | .011 | .065                            | .497        |
|   | Intersection count per sq. mile within weekday activity spaces | -.002                       | .009       | -.009                     | -.187  | .851 | -.019                           | .015        |
|   | Job count per sq. mile within weekday activity spaces          | -.007                       | .001       | -.408                     | -5.443 | .000 | -.009                           | -.004       |
|   | School count per sq. mile within weekday activity spaces       | .002                        | .002       | .076                      | 1.000  | .318 | -.002                           | .005        |
|   | Shop count per sq. mile within weekday activity spaces         | -.003                       | .001       | -.274                     | -4.846 | .000 | -.005                           | -.002       |
|   | Number of household members: 2                                 | .202                        | .231       | .039                      | .871   | .384 | -.254                           | .657        |
|   | household size greater than equals to 5                        | -.400                       | .346       | -.050                     | -1.156 | .249 | -1.080                          | .281        |
|   | ownership of another vehicle bicycle                           | 1.197                       | .389       | .130                      | 3.078  | .002 | .431                            | 1.963       |
|   | ownership of another vehicle rickshaw                          | .592                        | .681       | .037                      | .870   | .385 | -.748                           | 1.932       |
|   | Residence count per sq. mile within weekday activity spaces    | 7.856E-5                    | .000       | .032                      | .722   | .471 | .000                            | .000        |
|   | Population count per sq. mile within weekday activity spaces   | -1.004E-5                   | .000       | -.331                     | -5.971 | .000 | .000                            | .000        |

a. Dependent Variable: weekday activity space in sq. mile

**Table S10. Coefficients<sup>a</sup>.**

| Model |                                                                | Collinearity Statistics |       |
|-------|----------------------------------------------------------------|-------------------------|-------|
|       |                                                                | Tolerance               | VIF   |
| 1     | Car ownership status                                           | .913                    | 1.095 |
|       | Number of cars HH use for travel including office vehicles     | .952                    | 1.050 |
|       | number of members surveyed in each HH                          | .915                    | 1.093 |
|       | Intersection count per sq. mile within weekend activity spaces | .629                    | 1.590 |
|       | Job count per sq. mile within weekend activity spaces          | .250                    | 4.000 |
|       | School count per sq. mile within weekend activity spaces       | .256                    | 3.909 |
|       | Shop count per sq. mile within weekend activity spaces         | .679                    | 1.473 |
|       | Number of household members: 2                                 | .799                    | 1.251 |
|       | household size greater than equals to 5                        | .914                    | 1.094 |
|       | ownership of another vehicle bicycle                           | .900                    | 1.111 |
|       | ownership of another vehicle rickshaw                          | .933                    | 1.072 |
|       | Residence count per sq. mile within weekend activity spaces    | .843                    | 1.186 |

a. Dependent Variable: weekend activity space in sq. mile

Table S11. Coefficients<sup>a</sup>.

| Model |                                                                | Unstandardized Coefficients |            | Standardized Coefficients | t      | Sig. | 95.0% Confidence Interval for B |             |
|-------|----------------------------------------------------------------|-----------------------------|------------|---------------------------|--------|------|---------------------------------|-------------|
|       |                                                                | B                           | Std. Error | Beta                      |        |      | Lower Bound                     | Upper Bound |
| 1     | (Constant)                                                     | 4.561                       | .451       |                           | 10.103 | .000 | 3.671                           | 5.450       |
|       | Car ownership status                                           | .137                        | .183       | .035                      | .748   | .455 | -.224                           | .498        |
|       | Number of cars HH use for travel including office vehicles     | -.275                       | .166       | -.077                     | -1.657 | .099 | -.601                           | .052        |
|       | number of members surveyed in each HH                          | .131                        | .084       | .073                      | 1.548  | .123 | -.036                           | .297        |
|       | Intersection count per sq. mile within weekend activity spaces | .007                        | .006       | .066                      | 1.149  | .252 | -.005                           | .020        |
|       | Job count per sq. mile within weekend activity spaces          | -.004                       | .001       | -.256                     | -2.824 | .005 | -.006                           | -.001       |
|       | School count per sq. mile within weekend activity spaces       | -.004                       | .001       | -.248                     | -2.773 | .006 | -.007                           | -.001       |
|       | Shop count per sq. mile within weekend activity spaces         | -.004                       | .000       | -.471                     | -8.564 | .000 | -.005                           | -.003       |
|       | Number of household members: 2                                 | -.378                       | .184       | -.104                     | -2.055 | .041 | -.741                           | -.016       |
|       | household size greater than equals to 5                        | .945                        | .270       | .166                      | 3.506  | .001 | .414                            | 1.476       |
|       | ownership of another vehicle bicycle                           | .203                        | .321       | .030                      | .635   | .526 | -.428                           | .835        |
|       | ownership of another vehicle rickshaw                          | -.382                       | .503       | -.036                     | -.759  | .449 | -1.373                          | .610        |
|       | Residence count per sq. mile within weekend activity spaces    | -9.805E-6                   | .000       | -.008                     | -.170  | .865 | .000                            | .000        |

a. Dependent Variable: weekend activity space in sq. mile

**Table S12.** Model Summary.

| Model | R                 | R Square | Adjusted R Square | Std. Error of the Estimate | Change Statistics |          |     |     |               |
|-------|-------------------|----------|-------------------|----------------------------|-------------------|----------|-----|-----|---------------|
|       |                   |          |                   |                            | R Square Change   | F Change | df1 | df2 | Sig. F Change |
| 1     | .743 <sup>a</sup> | .552     | .529              | 5.99288                    | .552              | 23.772   | 14  | 270 | .000          |

a. Predictors: (Constant), Population count per sq. mile within weekday activity spaces, Number of household members: 2, Job count per sq. mile within weekday activity spaces, ownership of other vehicle\_rickshaw, Number of employed persons in the HH, ownership of other vehicle\_bicycle, Car ownership status, Number of cars HH use for travel including office vehicles, Residence count per sq. mile within weekday activity spaces, household size greater than equals to 5, number of members surveyed in each HH, Intersection count per sq. mile within weekday activity spaces, Shop count per sq. mile within weekday activity spaces, School count per sq. mile within weekday activity spaces

**Table S13.** ANOVA<sup>b</sup>.

| Model |            | Sum of Squares | df  | Mean Square | F      | Sig.              |
|-------|------------|----------------|-----|-------------|--------|-------------------|
| 1     | Regression | 11952.676      | 14  | 853.763     | 23.772 | .000 <sup>a</sup> |
|       | Residual   | 9696.941       | 270 | 35.915      |        |                   |
|       | Total      | 21649.616      | 284 |             |        |                   |

a. Predictors: (Constant), Population count per sq. mile within weekday activity spaces, Number of household members: 2, Job count per sq. mile within weekday activity spaces, ownership of other vehicle\_rickshaw, Number of employed persons in the HH, ownership of other vehicle\_bicycle, Car ownership status, Number of cars HH use for travel including office vehicles, Residence count per sq. mile within weekday activity spaces, household size greater than equals to 5, number of members surveyed in each HH, Intersection count per sq. mile within weekday activity spaces, Shop count per sq. mile within weekday activity spaces, School count per sq. mile within weekday activity spaces

b. Dependent Variable: weekday activity length in mile

**Table S14. Coefficients<sup>a</sup>**

| Model |                                                                | Unstandardized Coefficients |            | Standardized Coefficients | t      | Sig. | 95.0% Confidence Interval for B |             |
|-------|----------------------------------------------------------------|-----------------------------|------------|---------------------------|--------|------|---------------------------------|-------------|
|       |                                                                | B                           | Std. Error | Beta                      |        |      | Lower Bound                     | Upper Bound |
| 1     | (Constant)                                                     | 20.951                      | 3.103      |                           | 6.751  | .000 | 14.842                          | 27.061      |
|       | Number of employed persons in the HH                           | .214                        | 1.209      | .007                      | .177   | .860 | -2.166                          | 2.594       |
|       | Car ownership status                                           | 1.046                       | .859       | .052                      | 1.217  | .225 | -.646                           | 2.738       |
|       | Number of cars HH use for travel including office vehicles     | 1.577                       | .786       | .086                      | 2.007  | .046 | .030                            | 3.124       |
|       | number of members surveyed in each HH                          | .911                        | .412       | .097                      | 2.209  | .028 | .099                            | 1.723       |
|       | Intersection count per sq. mile within weekday activity spaces | -.004                       | .033       | -.006                     | -.123  | .902 | -.068                           | .060        |
|       | Job count per sq. mile within weekday activity spaces          | -.026                       | .005       | -.428                     | -5.756 | .000 | -.035                           | -.017       |
|       | School count per sq. mile within weekday activity spaces       | .006                        | .006       | .074                      | .968   | .334 | -.006                           | .018        |
|       | Shop count per sq. mile within weekday activity spaces         | -.013                       | .003       | -.278                     | -4.944 | .000 | -.019                           | -.008       |
|       | Number of household members: 2                                 | .723                        | .872       | .037                      | .829   | .408 | -.994                           | 2.439       |
|       | household size greater than equals to 5                        | -1.248                      | 1.302      | -.041                     | -.959  | .339 | -3.811                          | 1.315       |
|       | ownership of other vehicle_bicycle                             | 4.276                       | 1.465      | .122                      | 2.918  | .004 | 1.391                           | 7.160       |
|       | ownership of other vehicle_rickshaw                            | 2.134                       | 2.563      | .035                      | .832   | .406 | -2.913                          | 7.181       |
|       | Residence count per sq. mile within weekday activity spaces    | .000                        | .000       | .026                      | .579   | .563 | .000                            | .001        |
|       | Population count per sq. mile within weekday activity spaces   | -3.774E-5                   | .000       | -.329                     | -5.959 | .000 | .000                            | .000        |

a. Dependent Variable: weekday activity length in mile



**Table S15.** Model Summary.

| Model | R                 | R Square | Adjusted R Square | Std. Error of the Estimate | Change Statistics |          |     |     |               |
|-------|-------------------|----------|-------------------|----------------------------|-------------------|----------|-----|-----|---------------|
|       |                   |          |                   |                            | R Square Change   | F Change | df1 | df2 | Sig. F Change |
| 1     | .725 <sup>a</sup> | .526     | .501              | 4.60941                    | .526              | 21.287   | 12  | 230 | .000          |

a. Predictors: (Constant), Residence count per sq. mile within weekend activity spaces, School count per sq. mile within weekend activity spaces, household size greater than equals to 5, Number of cars HH use for travel including office vehicles, ownership of other vehicle\_bicycle, Car ownership status, number of members surveyed in each HH, ownership of other vehicle\_rickshaw, Intersection count per sq. mile within weekend activity spaces, Number of household members: 2, Shop count per sq. mile within weekend activity spaces, Job count per sq. mile within weekend activity spaces

**Table S16.** ANOVA<sup>b</sup>.

| Model |            | Sum of Squares | df  | Mean Square | F      | Sig.              |
|-------|------------|----------------|-----|-------------|--------|-------------------|
| 1     | Regression | 5427.279       | 12  | 452.273     | 21.287 | .000 <sup>a</sup> |
|       | Residual   | 4886.740       | 230 | 21.247      |        |                   |
|       | Total      | 10314.018      | 242 |             |        |                   |

a. Predictors: (Constant), Residence count per sq. mile within weekend activity spaces, School count per sq. mile within weekend activity spaces, household size greater than equals to 5, Number of cars HH use for travel including office vehicles, ownership of other vehicle\_bicycle, Car ownership status, number of members surveyed in each HH, ownership of other vehicle\_rickshaw, Intersection count per sq. mile within weekend activity spaces, Number of household members: 2, Shop count per sq. mile within weekend activity spaces, Job count per sq. mile within weekend activity spaces

b. Dependent Variable: weekend activity length in mile

**Table S17. Coefficients<sup>a</sup>**

| Model |                                                                | Unstandardized Coefficients |            | Standardized Coefficients | t      | Sig. | 95.0% Confidence Interval for B |             |
|-------|----------------------------------------------------------------|-----------------------------|------------|---------------------------|--------|------|---------------------------------|-------------|
|       |                                                                | B                           | Std. Error | Beta                      |        |      | Lower Bound                     | Upper Bound |
| 1     | (Constant)                                                     | 18.719                      | 1.770      |                           | 10.579 | .000 | 15.233                          | 22.206      |
|       | Car ownership status                                           | .510                        | .718       | .034                      | .711   | .478 | -.903                           | 1.924       |
|       | Number of cars HH use for travel including office vehicles     | -1.058                      | .650       | -.076                     | -1.629 | .105 | -2.338                          | .222        |
|       | number of members surveyed in each HH                          | .487                        | .331       | .070                      | 1.472  | .142 | -.165                           | 1.139       |
|       | Intersection count per sq. mile within weekend activity spaces | .029                        | .025       | .067                      | 1.176  | .241 | -.020                           | .079        |
|       | Job count per sq. mile within weekend activity spaces          | -.014                       | .005       | -.262                     | -2.886 | .004 | -.024                           | -.005       |
|       | School count per sq. mile within weekend activity spaces       | -.016                       | .006       | -.244                     | -2.715 | .007 | -.027                           | -.004       |
|       | Shop count per sq. mile within weekend activity spaces         | -.015                       | .002       | -.473                     | -8.587 | .000 | -.018                           | -.011       |
|       | Number of household members: 2                                 | -1.463                      | .721       | -.103                     | -2.027 | .044 | -2.884                          | -.041       |
|       | household size greater than equals to 5                        | 3.581                       | 1.056      | .161                      | 3.389  | .001 | 1.499                           | 5.663       |
|       | ownership of other vehicle_bicycle                             | .803                        | 1.257      | .031                      | .639   | .524 | -1.674                          | 3.279       |
|       | ownership of other vehicle_rickshaw                            | -1.405                      | 1.973      | -.033                     | -.712  | .477 | -5.292                          | 2.482       |
|       | Residence count per sq. mile within weekend activity spaces    | -5.036E-5                   | .000       | -.011                     | -.223  | .824 | .000                            | .000        |

a. Dependent Variable: weekend activity length in mile

**Table S18.** Network Information.

| Input Layer | Covariates |    |                                                |
|-------------|------------|----|------------------------------------------------|
|             |            | 1  | Gender of the respondent                       |
|             |            | 2  | Age of the respondent                          |
|             |            | 3  | Educational level of the respondent            |
|             |            | 4  | Employment situation of the respondent         |
|             |            | 5  | Occupation of the respondent                   |
|             |            | 6  | Income level of the HH head                    |
|             |            | 7  | Marrital status                                |
|             |            | 8  | Use of carpool to work                         |
|             |            | 9  | Use of home as workplace or work from home     |
|             |            | 10 | Whether use public transit or not              |
|             |            | 11 | A-R factor score 1 for analysis 1              |
|             |            | 12 | A-R factor score 2 for analysis 1              |
|             |            | 13 | A-R factor score 3 for analysis 1              |
|             |            | 14 | A-R factor score 4 for analysis 1              |
|             |            | 15 | A-R factor score 5 for analysis 1              |
|             |            | 16 | A-R factor score 6 for analysis 1              |
|             |            | 17 | A-R factor score 7 for analysis 1              |
|             |            | 18 | A-R factor score 8 for analysis 1              |
|             |            | 19 | A-R factor score 9 for analysis 1              |
|             |            | 20 | A-R factor score 10 for analysis 1             |
|             |            | 21 | Average daily distance traveled during weekday |

|                 |                                       |                                                |                                               |
|-----------------|---------------------------------------|------------------------------------------------|-----------------------------------------------|
| Hidden Layer(s) |                                       | 22                                             | Average daily trip duration during weekday    |
|                 |                                       | 23                                             | Average daily travel cost during weekday      |
|                 |                                       | Number of Units <sup>a</sup>                   | 23                                            |
|                 |                                       | Rescaling Method for Covariates                | Standardized                                  |
|                 |                                       | Number of Hidden Layers                        | 1                                             |
|                 |                                       | Number of Units in Hidden Layer 1 <sup>a</sup> | 6                                             |
| Output Layer    |                                       | Activation Function                            | Hyperbolic tangent                            |
|                 | Dependent Variables                   | 1                                              | individual weekday activity space in sq. mile |
|                 | Number of Units                       |                                                | 1                                             |
|                 | Rescaling Method for Scale Dependents |                                                | Standardized                                  |
|                 | Activation Function                   |                                                | Identity                                      |
|                 | Error Function                        |                                                | Sum of Squares                                |

a. Excluding the bias unit

**Table S19.** Parameter Estimates.

| Predictor      |                      | Predicted      |        |        |        |        |              | Activity_space_wd_ind |
|----------------|----------------------|----------------|--------|--------|--------|--------|--------------|-----------------------|
|                |                      | Hidden Layer 1 |        |        |        |        | Output Layer |                       |
|                |                      | H(1:1)         | H(1:2) | H(1:3) | H(1:4) | H(1:5) | H(1:6)       |                       |
| Input Layer    | (Bias)               | -.218          | -.064  | -.598  | .580   | -.353  | .339         |                       |
|                | Gender               | -.359          | -.268  | -.060  | .066   | -.187  | .096         |                       |
|                | Age                  | -.278          | .290   | .236   | -.081  | -.686  | -.006        |                       |
|                | Education            | .531           | .629   | .304   | .483   | -.021  | -.198        |                       |
|                | Employment_status    | -.076          | .160   | -.147  | .160   | .385   | .649         |                       |
|                | Occupation           | -.188          | .238   | -.035  | -.148  | .265   | .578         |                       |
|                | Income               | .303           | .608   | -.413  | .368   | -.390  | -.024        |                       |
|                | Status_marrital      | .270           | -.058  | .032   | .016   | -.355  | -.207        |                       |
|                | Carpool              | -.148          | .452   | .512   | .118   | .309   | .082         |                       |
|                | Work_at_home_typical | -.374          | .547   | .352   | -.098  | -.074  | .752         |                       |
|                | Use_transit_or_not   | .229           | .256   | .390   | -.215  | .066   | -.290        |                       |
|                | FAC1_1               | .384           | .545   | -.125  | .374   | -.204  | -.200        |                       |
|                | FAC2_1               | .258           | -.355  | -.677  | -.421  | .485   | .406         |                       |
|                | FAC3_1               | .115           | .439   | .501   | -.483  | -.399  | -.765        |                       |
|                | FAC4_1               | -.483          | -.166  | -.187  | .121   | -.379  | .488         |                       |
|                | FAC5_1               | .374           | .405   | .023   | -.182  | -.323  | -.328        |                       |
|                | FAC6_1               | -.371          | -.477  | -.163  | -.473  | .811   | .556         |                       |
|                | FAC7_1               | -.097          | .259   | .184   | .257   | .385   | -.027        |                       |
|                | FAC8_1               | .440           | .482   | .338   | .282   | -.277  | -.181        |                       |
|                | FAC9_1               | -.466          | -.203  | .241   | .373   | .029   | -.359        |                       |
|                | FAC10_1              | .070           | .105   | .054   | .003   | .105   | -.464        |                       |
|                | Avg_distance_wd      | .627           | -.024  | .471   | -.125  | -.415  | .833         |                       |
|                | Avg_duartion_wd      | .418           | .233   | .512   | -.631  | -.712  | 1.189        |                       |
|                | Avg_cost_wd          | .790           | .568   | -.649  | -.649  | -.551  | .179         |                       |
| Hidden Layer 1 | (Bias)               |                |        |        |        |        |              | .132                  |
|                | H(1:1)               |                |        |        |        |        |              | .426                  |
|                | H(1:2)               |                |        |        |        |        |              | -.467                 |
|                | H(1:3)               |                |        |        |        |        |              | .492                  |
|                | H(1:4)               |                |        |        |        |        |              | -.064                 |
|                | H(1:5)               |                |        |        |        |        |              | -.251                 |
|                | H(1:6)               |                |        |        |        |        |              | .341                  |

**Table S20.** Network Information.

| Input Layer | Covariates |    |                                                |
|-------------|------------|----|------------------------------------------------|
|             |            | 1  | Gender of the respondent                       |
|             |            | 2  | Age of the respondent                          |
|             |            | 3  | Educational level of the respondent            |
|             |            | 4  | Employment situation of the respondent         |
|             |            | 5  | Occupation of the respondent                   |
|             |            | 6  | Income level of the HH head                    |
|             |            | 7  | Marital status                                 |
|             |            | 8  | Use of carpool to work                         |
|             |            | 9  | Use of home as workplace or work from home     |
|             |            | 10 | Whether use public transit or not              |
|             |            | 11 | A-R factor score 1 for analysis 1              |
|             |            | 12 | A-R factor score 2 for analysis 1              |
|             |            | 13 | A-R factor score 3 for analysis 1              |
|             |            | 14 | A-R factor score 4 for analysis 1              |
|             |            | 15 | A-R factor score 5 for analysis 1              |
|             |            | 16 | A-R factor score 6 for analysis 1              |
|             |            | 17 | A-R factor score 7 for analysis 1              |
|             |            | 18 | A-R factor score 8 for analysis 1              |
|             |            | 19 | A-R factor score 9 for analysis 1              |
|             |            | 20 | A-R factor score 10 for analysis 1             |
|             |            | 21 | Average daily distance traveled during weekend |

|                 |                                       |                                                |                                               |
|-----------------|---------------------------------------|------------------------------------------------|-----------------------------------------------|
| Hidden Layer(s) |                                       | 22                                             | Average daily trip duration during weekend    |
|                 |                                       | 23                                             | Average daily travel cost during weekend      |
|                 |                                       | Number of Units <sup>a</sup>                   | 23                                            |
|                 |                                       | Rescaling Method for Covariates                | Standardized                                  |
|                 |                                       | Number of Hidden Layers                        | 1                                             |
|                 |                                       | Number of Units in Hidden Layer 1 <sup>a</sup> | 6                                             |
| Output Layer    |                                       | Activation Function                            | Hyperbolic tangent                            |
|                 | Dependent Variables                   | 1                                              | individual weekend activity space in sq. mile |
|                 | Number of Units                       |                                                | 1                                             |
|                 | Rescaling Method for Scale Dependents |                                                | Standardized                                  |
|                 | Activation Function                   |                                                | Identity                                      |
|                 | Error Function                        |                                                | Sum of Squares                                |

a. Excluding the bias unit

**Table S21.** Parameter Estimates.

| Predictor      |                      | Predicted      |        |        |        |        |              | Activity_space_we_ind |
|----------------|----------------------|----------------|--------|--------|--------|--------|--------------|-----------------------|
|                |                      | Hidden Layer 1 |        |        |        |        | Output Layer |                       |
|                |                      | H(1:1)         | H(1:2) | H(1:3) | H(1:4) | H(1:5) | H(1:6)       |                       |
| Input Layer    | (Bias)               | -.315          | -.347  | -.760  | -.722  | -.156  | -.324        |                       |
|                | Gender               | .196           | .666   | .157   | .470   | .283   | -.316        |                       |
|                | Age                  | -.218          | -.334  | -.478  | -.005  | -.077  | -.349        |                       |
|                | Education            | .463           | -.265  | -.291  | -.226  | -.098  | .551         |                       |
|                | Employment_status    | .162           | -.265  | .332   | .044   | -.252  | .081         |                       |
|                | Occupation           | .594           | -.082  | .009   | -.067  | -.173  | .370         |                       |
|                | Income               | -.101          | -.155  | .422   | -.441  | -.027  | -.153        |                       |
|                | Status_marrital      | -.615          | -.397  | -.041  | -.127  | -.009  | .115         |                       |
|                | Carpool              | -.886          | .235   | -.465  | .038   | .120   | -.193        |                       |
|                | Work_at_home_typical | -.087          | .605   | .252   | -.506  | -.463  | -.385        |                       |
|                | Use_transit_or_not   | -.238          | .174   | .579   | -.255  | .424   | -.253        |                       |
|                | FAC1_1               | .496           | .077   | .660   | -.007  | .130   | .244         |                       |
|                | FAC2_1               | -.259          | -.405  | -.600  | .198   | .280   | .093         |                       |
|                | FAC3_1               | .102           | .542   | .431   | -.571  | .607   | -.219        |                       |
|                | FAC4_1               | -.105          | .338   | .833   | .077   | -.619  | .246         |                       |
|                | FAC5_1               | .448           | .071   | .001   | -.148  | -.011  | .499         |                       |
|                | FAC6_1               | -.005          | -.022  | .921   | -.448  | -.044  | .406         |                       |
|                | FAC7_1               | .036           | .132   | .001   | .010   | -.111  | .255         |                       |
|                | FAC8_1               | .723           | -.384  | .501   | .194   | -.432  | .432         |                       |
|                | FAC9_1               | .523           | .153   | .544   | .562   | .239   | -.113        |                       |
|                | FAC10_1              | .033           | .083   | .366   | .124   | -.305  | -.201        |                       |
|                | Avg_distance_we      | .233           | -1.109 | -.280  | .968   | -.250  | 1.226        |                       |
|                | Avg_duration_we      | -.047          | -.333  | .283   | .482   | -.652  | .649         |                       |
|                | Avg_cost_we          | -.330          | -.467  | .132   | -.568  | .382   | .140         |                       |
| Hidden Layer 1 | (Bias)               |                |        |        |        |        |              | .399                  |
|                | H(1:1)               |                |        |        |        |        |              | -.480                 |
|                | H(1:2)               |                |        |        |        |        |              | -.337                 |
|                | H(1:3)               |                |        |        |        |        |              | .629                  |
|                | H(1:4)               |                |        |        |        |        |              | .415                  |
|                | H(1:5)               |                |        |        |        |        |              | .251                  |
|                | H(1:6)               |                |        |        |        |        |              | .412                  |



**Table S22.** Network Information.

|                 |                     |                                                |                                                                |
|-----------------|---------------------|------------------------------------------------|----------------------------------------------------------------|
| Input Layer     | Covariates          | 1                                              | Number of members in the HH                                    |
|                 |                     | 2                                              | Number of employed persons in the HH                           |
|                 |                     | 3                                              | Car ownership status                                           |
|                 |                     | 4                                              | Number of cars HH use for travel including office vehicles     |
|                 |                     | 5                                              | Ownership status of other vehicles                             |
|                 |                     | 6                                              | number of members surveyed in each HH                          |
|                 |                     | 7                                              | Intersection count per sq. mile within weekday activity spaces |
|                 |                     | 8                                              | Job count per sq. mile within weekday activity spaces          |
|                 |                     | 9                                              | School count per sq. mile within weekday activity spaces       |
|                 |                     | 10                                             | Shop count per sq. mile within weekday activity spaces         |
|                 |                     | 11                                             | Residence count per sq. mile within weekday activity spaces    |
|                 |                     | 12                                             | Population count per sq. mile within weekday activity spaces   |
| Hidden Layer(s) |                     | Number of Units <sup>a</sup>                   | 12                                                             |
|                 |                     | Rescaling Method for Covariates                | Standardized                                                   |
|                 |                     | Number of Hidden Layers                        | 1                                                              |
| Output Layer    | Dependent Variables | Number of Units in Hidden Layer 1 <sup>a</sup> | 2                                                              |
|                 |                     | Activation Function                            | Hyperbolic tangent                                             |
|                 |                     | 1                                              | weekday activity length in mile                                |
|                 |                     | 2                                              | weekday activity space in sq. mile                             |
|                 |                     | Number of Units                                | 2                                                              |

|                                       |                |
|---------------------------------------|----------------|
| Rescaling Method for Scale Dependents | Standardized   |
| Activation Function                   | Identity       |
| Error Function                        | Sum of Squares |

a. Excluding the bias unit

**Table S23.** Network Information.

|                 |                     |                                                |                                                                |
|-----------------|---------------------|------------------------------------------------|----------------------------------------------------------------|
| Input Layer     | Covariates          | 1                                              | Number of members in the HH                                    |
|                 |                     | 2                                              | Number of employed persons in the HH                           |
|                 |                     | 3                                              | Car ownership status                                           |
|                 |                     | 4                                              | Number of cars HH use for travel including office vehicles     |
|                 |                     | 5                                              | Ownership status of other vehicles                             |
|                 |                     | 6                                              | number of members surveyed in each HH                          |
|                 |                     | 7                                              | Intersection count per sq. mile within weekend activity spaces |
|                 |                     | 8                                              | Job count per sq. mile within weekend activity spaces          |
|                 |                     | 9                                              | School count per sq. mile within weekend activity spaces       |
|                 |                     | 10                                             | Shop count per sq. mile within weekend activity spaces         |
|                 |                     | 11                                             | Residence count per sq. mile within weekend activity spaces    |
| Hidden Layer(s) |                     | Number of Units <sup>a</sup>                   | 11                                                             |
|                 |                     | Rescaling Method for Covariates                | Standardized                                                   |
|                 |                     | Number of Hidden Layers                        | 1                                                              |
|                 |                     | Number of Units in Hidden Layer 1 <sup>a</sup> | 2                                                              |
| Output Layer    | Dependent Variables | Activation Function                            | Hyperbolic tangent                                             |
|                 |                     | 1                                              | weekend activity length in mile                                |
|                 |                     | 2                                              | weekend activity space in sq. mile                             |

|                                       |                |   |
|---------------------------------------|----------------|---|
| Number of Units                       |                | 2 |
| Rescaling Method for Scale Dependents | Standardized   |   |
| Activation Function                   | Identity       |   |
| Error Function                        | Sum of Squares |   |

a. Excluding the bias unit

**Table S24.** Parameter Estimates

| Predictor      |                         | Predicted      |         |                    |                  |
|----------------|-------------------------|----------------|---------|--------------------|------------------|
|                |                         | Hidden Layer 1 |         | Output Layer       |                  |
|                |                         | H (1:1)        | H (1:2) | Activity_length_wd | Activity_area_wd |
| Input Layer    | (Bias)                  | .835           | -.418   |                    |                  |
|                | HH_size                 | .024           | -.037   |                    |                  |
|                | No_of_employee          | .012           | -.111   |                    |                  |
|                | Car_ownership           | -.030          | -.427   |                    |                  |
|                | No_of_car               | -.020          | -.004   |                    |                  |
|                | Other_vehicles          | .078           | -.295   |                    |                  |
|                | No_of_members           | .025           | -.010   |                    |                  |
|                | Intersection_density_wd | -.010          | -.312   |                    |                  |
|                | Job_density_wd          | .232           | .291    |                    |                  |
|                | School_density_wd       | .211           | .165    |                    |                  |
|                | Retailshop_density_wd   | .231           | -.087   |                    |                  |
|                | Residential_density_wd  | -.099          | .174    |                    |                  |
|                | Population_density_wd   | 1.536          | .205    |                    |                  |
| Hidden Layer 1 | (Bias)                  |                |         | .323               | .425             |
|                | H (1:1)                 |                |         | -1.637             | -1.719           |
|                | H (1:2)                 |                |         | -.431              | -.300            |

**Table S25.** Parameter Estimates

| Predictor      |                         | Predicted      |         |                    |                  |
|----------------|-------------------------|----------------|---------|--------------------|------------------|
|                |                         | Hidden Layer 1 |         | Output Layer       |                  |
|                |                         | H (1:1)        | H (1:2) | Activity_length_we | Activity_area_we |
| Input Layer    | (Bias)                  | -.466          | -.089   |                    |                  |
|                | HH_size                 | .660           | -.062   |                    |                  |
|                | No_of_employee          | .357           | -.113   |                    |                  |
|                | Car_ownership           | -.135          | -.125   |                    |                  |
|                | No_of_car               | -.017          | .070    |                    |                  |
|                | Other_vehicles          | -.089          | -.051   |                    |                  |
|                | No_of_members           | .093           | .224    |                    |                  |
|                | Intersection_density_we | .390           | -.058   |                    |                  |
|                | Job_density_we          | -.142          | .536    |                    |                  |
|                | School_density_we       | -.887          | -.167   |                    |                  |
|                | Retailshop_density_we   | -.901          | .246    |                    |                  |
|                | Residential_density_we  | -.064          | .558    |                    |                  |
| Hidden Layer 1 | (Bias)                  |                |         | .358               | .183             |
|                | H (1:1)                 |                |         | .780               | 1.045            |
|                | H (1:2)                 |                |         | .101               | -.375            |

## HOUSEHOLD SURVEY

### HOUSEHOLD SURVEY

#### TRAVEL AND ACTIVITY STUDY IN DHAKA CITY, BANGLADESH

Institute of Transportation Studies  
UNIVERSITY OF CALIFORNIA, IRVINE

Household ID:

|  |  |  |
|--|--|--|
|  |  |  |
|--|--|--|

*This code will be assigned by the research team.*

Name of the Surveyor:

### PART A

#### General and Household Information

|     |                                                                                      |                                              |                                 |
|-----|--------------------------------------------------------------------------------------|----------------------------------------------|---------------------------------|
|     | Name                                                                                 |                                              |                                 |
|     | Home Address (Give exact detail address)                                             |                                              |                                 |
|     | Contact number (Cell)                                                                |                                              |                                 |
| 1.  | Gender                                                                               | 1: Male                                      | 2: Female                       |
| 2.  | Age <sup>1</sup>                                                                     |                                              |                                 |
| 3.  | Educational attainment <sup>2</sup>                                                  |                                              |                                 |
| 4.  | Employment status                                                                    | 1: Not employed<br>time                      | 2: Part time    3: Full<br>time |
| 5.  | Occupation <sup>3</sup>                                                              |                                              |                                 |
| 6.  | Monthly Income <sup>4</sup>                                                          |                                              |                                 |
| 7.  | Household size <sup>5</sup>                                                          |                                              |                                 |
| 8.  | Household employee                                                                   | 1: 0                                         | 2: 1+                           |
|     | Study area                                                                           | 1: Dhanmondi                                 | 2: Mirpur                       |
| 9.  | Work Address (Give exact detail address)                                             |                                              |                                 |
| 10. | Marital Status                                                                       | 1: Married 2: Unmarried 3: Widowed/ Divorced |                                 |
| 11. | Number of Children 4–14 years                                                        |                                              |                                 |
| 12. | Number of Children 15–18 years                                                       |                                              |                                 |
| 13. | Number of Children 18 years +                                                        |                                              |                                 |
| 14. | Number of Elderly above 65 years                                                     |                                              |                                 |
| 15. | Do you own a private car?                                                            | 1: Yes                                       | 2: No                           |
| 16. | How many cars your family use for travel?<br>(include office vehicles if applicable) |                                              |                                 |
| 17. | What other vehicles do you own?                                                      | 1. Bicycle                                   | 3. Motorcycle                   |
|     |                                                                                      | 2. Rickshaw                                  | 4. CNG    Auto<br>Rickshaw      |

|     |                                        |               |                      |
|-----|----------------------------------------|---------------|----------------------|
| 18. | What is your preferred mode of travel? | 1. On foot    | 7. CNG Auto Rickshaw |
|     |                                        | 2. Bicycle    | 8. Jeep              |
|     |                                        | 3. Rickshaw   | 9. Microbus          |
|     |                                        | 4. Motorcycle | 10. Bus              |
|     |                                        | 5. Car        | 11. Human Hauler     |
|     |                                        | 6. Taxicab    | 12. Pickup           |

<sup>1</sup>**Age** = 1:18–20 years, 2:21–24 years, 3:25–34 years, 4:35–54 years, 5:55–64 years, 6:65 years or older

<sup>2</sup>**Education** = 1: Primary, 2: Secondary, 3: SSC, 4: HSC, 5: Undergraduate, 6: Postgraduate, 7: More highly educated

<sup>3</sup>**Occupation** = 1: Private Service Holder, 2: Govt. Service Holder, 3: Teacher, 4: Lawyer, 5: Physician/Doctor, 6: Engineer, 7: Nurse, 8: Businessman, 9: Retired 10: Unemployed

<sup>4</sup>**Monthly Income** = 1: Less than BDT 15,000, 2: BDT 15,000–29,999, 3: BDT 30,000–49,999, 4: BDT 50,000–74,999, 5: BDT 75,000 or more

<sup>5</sup>**Household size** = 1:1, 2:2, 3:3, 4:4, 5 :> =5

## PART B

### General Travel Information (Weekday)

#### About Your Typical Weekday Travel

Now think about your travel on a typical weekday (Sunday through Thursday). Please answer the following questions about how you travel to your work on a typical weekday:

On a typical workday, I travel to work by (check all that applies):

1=Car

2=Bus

3=Train

4=Bicycle

5=Rickshaw

6=Walking

6=others (specify)

7=I work at home

8=I am not employed

On a typical workday, do you carpool to work with other people?

1=Yes

2=No

During a typical work week, do you work at home?

1=Yes

2=No

How many days per week do you usually work at home?

1=1

2=2

3=3

4=4

5=5

6=6

7=7

Do you use public transit frequently?

1=No, 2=Yes

If No, why?

1=Long distance to nearest transit stop

2=Lack of Personal safety

3=Lack of Comfort

4=Lack of Privacy

5=Due to certain Social norms

6=Specific Gender issues

7=Inbuilt negative perception toward public transit

8= others (specify)

If yes, how often do you use public transit?

1=hardly ever

2=few times a year

3=few times a month

4=few times a week

5=almost every day

During the past 2 weeks, how many days did you use public transit (bus)?

1=0 days 2=1-3 days 3=4-6 days 4=7-9 days 5=10 days or more

Please estimate the average time it takes to walk from your home to the nearest public transit stop:

1=Less than 5 minutes

2=5 to 10 minutes

3=10 to 15 minutes

4=15 to 30 minutes

5=More than 30 minutes



## PART B

### Perception (attitude) Related Information

The next set of questions asks you about individual characteristics and preferences which could be related to your travel choices. You will be asked your opinion on a range of transportation topics. Please select the answer that most closely reflects your feeling or experience.

Please read each of the following statements and indicate how much you agree or disagree with each of them.

| Statement                                                                       | Strongly disagree | Moderately disagree | Slightly disagree | Neither agree or disagree | Slightly agree | Moderately agree | Strongly agree |
|---------------------------------------------------------------------------------|-------------------|---------------------|-------------------|---------------------------|----------------|------------------|----------------|
| I am satisfied with how I am getting into my daily locations every day.         |                   |                     |                   |                           |                |                  |                |
| Much of my travel is done to meet the needs of others in my household.          |                   |                     |                   |                           |                |                  |                |
| I enjoy walking or bicycling near my home to travel short distance.             |                   |                     |                   |                           |                |                  |                |
| Public bus schedule is convenient for me.                                       |                   |                     |                   |                           |                |                  |                |
| Public bus takes me where I need to go.                                         |                   |                     |                   |                           |                |                  |                |
| I can get things done while riding public bus that I can't do in my car.        |                   |                     |                   |                           |                |                  |                |
| Taking the bus could save me money compared to driving a car.                   |                   |                     |                   |                           |                |                  |                |
| I am facing difficulty to get access to public bus.                             |                   |                     |                   |                           |                |                  |                |
| I am uncomfortable on a crowded bus.                                            |                   |                     |                   |                           |                |                  |                |
| I don't know enough about public transit within my daily travel area to use it. |                   |                     |                   |                           |                |                  |                |
| I feel pressed for time in my daily travels.                                    |                   |                     |                   |                           |                |                  |                |
| Using public bus takes too long to reach destination compared to going by car.  |                   |                     |                   |                           |                |                  |                |
| I carry negative attitude towards using public transit.                         |                   |                     |                   |                           |                |                  |                |
| I feel restricted because I don't have access to a car often enough.            |                   |                     |                   |                           |                |                  |                |

| Statement                                                                                                                     | Strongly disagree | Moderately disagree | Slightly disagree | Neither agree or disagree | Slightly agree | Moderately agree | Strongly agree |
|-------------------------------------------------------------------------------------------------------------------------------|-------------------|---------------------|-------------------|---------------------------|----------------|------------------|----------------|
| Due to not having a private car I often miss social functions especially during night.                                        |                   |                     |                   |                           |                |                  |                |
| Due to social trend, I want/wanted to buy private car.                                                                        |                   |                     |                   |                           |                |                  |                |
| I am feeling socially deprived for not having a car.                                                                          |                   |                     |                   |                           |                |                  |                |
| My car is an important part of who I am.                                                                                      |                   |                     |                   |                           |                |                  |                |
| My car acts as a symbol of social status for me.                                                                              |                   |                     |                   |                           |                |                  |                |
| I like the privacy of riding in a car compared to other modes of traveling.                                                   |                   |                     |                   |                           |                |                  |                |
| According to me, car is more safe/secure in compare to other travel modes.                                                    |                   |                     |                   |                           |                |                  |                |
| My accessibility to car helps travel greater distance.                                                                        |                   |                     |                   |                           |                |                  |                |
| It is/would be difficult to get everything done without a car especially when multiple destinations are needed to be covered. |                   |                     |                   |                           |                |                  |                |
| I do not have a car due to affordability issues.                                                                              |                   |                     |                   |                           |                |                  |                |
| I am saving money by cutting down other household expenses to buy a car.                                                      |                   |                     |                   |                           |                |                  |                |
| There are plenty of places to shop within walking distance of my home.                                                        |                   |                     |                   |                           |                |                  |                |
| I can get most of my personal business (like banking, laundry, etc.) done within walking distance of my home.                 |                   |                     |                   |                           |                |                  |                |
| There are good restaurants within walking distance of my home.                                                                |                   |                     |                   |                           |                |                  |                |
| I can easily access to different facilities along my daily travel path.                                                       |                   |                     |                   |                           |                |                  |                |
| There are enough places in my daily travel area where I can go for recreation or entertainment.                               |                   |                     |                   |                           |                |                  |                |
| Protecting the environment is important to me.                                                                                |                   |                     |                   |                           |                |                  |                |

| Statement                                                                        | Strongly disagree | Moderately disagree | Slightly disagree | Neither agree or disagree | Slightly agree | Moderately agree | Strongly agree |
|----------------------------------------------------------------------------------|-------------------|---------------------|-------------------|---------------------------|----------------|------------------|----------------|
| Noise and pollution from cars and trucks is a problem in my daily travel area.   |                   |                     |                   |                           |                |                  |                |
| Reducing car use is beneficial to the environment.                               |                   |                     |                   |                           |                |                  |                |
| To protect the environment, I try to use my car as less as possible.             |                   |                     |                   |                           |                |                  |                |
| Increasing use of public transit is beneficial to the environment.               |                   |                     |                   |                           |                |                  |                |
| I try to minimize my impact on the environment by taking the bus whenever I can. |                   |                     |                   |                           |                |                  |                |

### Your Thoughts About Safety and Transportation

The following section includes questions about safety and security concerns you might have in your daily travel area (activity space) and when you use transit. Please select only one answer for each of the questions below.

Have you ever had a problem with personal safety while walking in your daily travel area?

- 1=No
- 2=Yes, during the day only
- 3=Yes, at night only
- 4=Yes, during the day and at night

Have you ever had a problem with personal safety where you get on and off the bus?

- 1=No
- 2=Yes, during the day only
- 3=Yes, at night only
- 4=Yes, during the day and at night

Have you ever had a problem with personal safety while riding the bus?

- 1=No
- 2=Yes, during the day only
- 3=Yes, at night only
- 4=Yes, during the day and at night

If you have had a personal safety problem when using public transit, what was it?

- 1=none
- 2=harassment
- 3=robbery
- 4=physical attack
- 5=more than one of the above
- 6=others (specify)

Please indicate how safe you feel when...

|                                                     | <b>Completely<br/>unafraid</b> | <b>Unafraid</b> | <b>Somewhat<br/>unafraid</b> | <b>Neither</b> | <b>Somewhat<br/>afraid</b> | <b>Afraid</b> | <b>Extremely<br/>afraid</b> |
|-----------------------------------------------------|--------------------------------|-----------------|------------------------------|----------------|----------------------------|---------------|-----------------------------|
| Walking in your daily travel area during the day.   |                                |                 |                              |                |                            |               |                             |
| Walking in your daily travel area at night.         |                                |                 |                              |                |                            |               |                             |
| Where you get on and off of the bus during the day. |                                |                 |                              |                |                            |               |                             |
| Where you get on and off of the train/bus at night. |                                |                 |                              |                |                            |               |                             |
| While riding on the bus during the day.             |                                |                 |                              |                |                            |               |                             |

|                                      |  |  |  |  |  |  |  |
|--------------------------------------|--|--|--|--|--|--|--|
| While riding on<br>the bus at night. |  |  |  |  |  |  |  |
|--------------------------------------|--|--|--|--|--|--|--|

**TRAVEL LOG**  
**TRAVEL AND ACTIVITY STUDY**  
**IN DHAKA CITY, BANGLADESH**  
Institute of Transportation Studies  
UNIVERSITY OF CALIFORNIA, IRVINE

Household ID (same as the  
respective survey questionnaire):

|  |  |  |
|--|--|--|
|  |  |  |
|--|--|--|

Person ID:

|  |  |  |
|--|--|--|
|  |  |  |
|--|--|--|

*These codes will be assigned by the research team.*

Thank you for completing the above portion of the study (Questionnaire part). Your response is very important to us. The next step is to fill out the seven-day travel logs for all the members (age greater than or equal to 12) in the household. Following is a sample of one travel log which will be completed by one individual member of the household for all seven days of a week. Each adult member needs to fill-up the log by him or herself. For the travel logs of members under age 18, any other adult member from the household can fill up. Please try to be as accurate as possible with your responses. The quality of this study depends on the getting the best possible information from you. You are an important member of the study team!

**Working Day 1 (Sunday):**

**কাজের দিন ১ (রবিবার)**

| Trip<br>ভ্রম<br>ন | Trip<br>Segment<br>(TS)<br>[if any]<br>ভ্রমণের<br>ভাগ (যদি<br>থাকে) | Origin<br>(Provide<br>detail<br>address)<br>যাত্রা শুরুর<br>জায়গা<br>(বিস্তারিত<br>ত ঠিকানা<br>প্রদান<br>করুন) | Destination<br>(Provide detail<br>address)<br>গন্তব্য<br>(বিস্তারিত<br>ঠিকানা প্রদান<br>করুন) | Purpose <sup>1</sup><br>ভ্রমণের<br>উদ্দেশ্য | Mode <sup>2</sup><br>যান<br>বাহন | Distanc<br>e<br>(km)<br>দূরত্ব<br>(কিমি.) | Duration<br>(minutes)<br>সময়কাল<br>(মিনিট) | Cost<br>(BDT)<br>খরচ<br>(টাকা) | Time <sup>3</sup><br>সময় |
|-------------------|---------------------------------------------------------------------|-----------------------------------------------------------------------------------------------------------------|-----------------------------------------------------------------------------------------------|---------------------------------------------|----------------------------------|-------------------------------------------|---------------------------------------------|--------------------------------|---------------------------|
| 1                 | TS 1<br>ভ্রমণ ভাগ ১                                                 |                                                                                                                 |                                                                                               |                                             |                                  |                                           |                                             |                                |                           |
|                   | TS 2<br>ভ্রমণ ভাগ ২                                                 |                                                                                                                 |                                                                                               |                                             |                                  |                                           |                                             |                                |                           |
|                   | TS 3<br>ভ্রমণ ভাগ ৩                                                 |                                                                                                                 |                                                                                               |                                             |                                  |                                           |                                             |                                |                           |

|   |                     |  |  |  |  |  |  |  |  |
|---|---------------------|--|--|--|--|--|--|--|--|
| 2 | TS 1<br>ভ্রমণ ভাগ ১ |  |  |  |  |  |  |  |  |
|   | TS 2<br>ভ্রমণ ভাগ ২ |  |  |  |  |  |  |  |  |
|   | TS 3<br>ভ্রমণ ভাগ ৩ |  |  |  |  |  |  |  |  |
| 3 | TS 1<br>ভ্রমণ ভাগ ১ |  |  |  |  |  |  |  |  |
|   | TS 2<br>ভ্রমণ ভাগ ২ |  |  |  |  |  |  |  |  |
|   | TS 3<br>ভ্রমণ ভাগ ৩ |  |  |  |  |  |  |  |  |
| 4 | TS 1<br>ভ্রমণ ভাগ ১ |  |  |  |  |  |  |  |  |
|   | TS 2<br>ভ্রমণ ভাগ ২ |  |  |  |  |  |  |  |  |
|   | TS 3<br>ভ্রমণ ভাগ ৩ |  |  |  |  |  |  |  |  |

Working Day 2 (Monday):

কাজের দিন ২ (সোমবার)

| Trip<br>ভ্রমণ | Trip<br>Segment<br>(TS)<br>[if any]<br>ভ্রমণের<br>ভাগ (যদি<br>থাকে) | Origin<br>(Provide<br>detail<br>address)<br>যাত্রা শুরুর<br>জায়গা<br>(বিস্তারিত<br>ত ঠিকানা<br>প্রদান<br>করুন) | Destination<br>(Provide detail<br>address)<br>গন্তব্য<br>(বিস্তারিত<br>ঠিকানা প্রদান<br>করুন) | Purpose <sup>1</sup><br>ভ্রমণের<br>উদ্দেশ্য | Mode <sup>2</sup><br>যান<br>বাহন | Distance<br>(km)<br>দূরত্ব<br>(কিমি.) | Duration<br>(minutes)<br>সময়কাল<br>(মিনিট) | Cost<br>(BDT)<br>খরচ<br>(টাকা) | Time <sup>3</sup><br>সময় |
|---------------|---------------------------------------------------------------------|-----------------------------------------------------------------------------------------------------------------|-----------------------------------------------------------------------------------------------|---------------------------------------------|----------------------------------|---------------------------------------|---------------------------------------------|--------------------------------|---------------------------|
| 1             | TS 1<br>ভ্রমণ ভাগ ১                                                 |                                                                                                                 |                                                                                               |                                             |                                  |                                       |                                             |                                |                           |
|               | TS 2<br>ভ্রমণ ভাগ ২                                                 |                                                                                                                 |                                                                                               |                                             |                                  |                                       |                                             |                                |                           |
|               | TS 3<br>ভ্রমণ ভাগ ৩                                                 |                                                                                                                 |                                                                                               |                                             |                                  |                                       |                                             |                                |                           |
| 2             | TS 1<br>ভ্রমণ ভাগ ১                                                 |                                                                                                                 |                                                                                               |                                             |                                  |                                       |                                             |                                |                           |
|               | TS 2<br>ভ্রমণ ভাগ ২                                                 |                                                                                                                 |                                                                                               |                                             |                                  |                                       |                                             |                                |                           |
|               | TS 3<br>ভ্রমণ ভাগ ৩                                                 |                                                                                                                 |                                                                                               |                                             |                                  |                                       |                                             |                                |                           |

|   |                     |  |  |  |  |  |  |  |  |
|---|---------------------|--|--|--|--|--|--|--|--|
| 3 | TS 1<br>ভ্রমণ ভাগ ১ |  |  |  |  |  |  |  |  |
|   | TS 2<br>ভ্রমণ ভাগ ২ |  |  |  |  |  |  |  |  |
|   | TS 3<br>ভ্রমণ ভাগ ৩ |  |  |  |  |  |  |  |  |
| 4 | TS 1<br>ভ্রমণ ভাগ ১ |  |  |  |  |  |  |  |  |
|   | TS 2<br>ভ্রমণ ভাগ ২ |  |  |  |  |  |  |  |  |
|   | TS 3<br>ভ্রমণ ভাগ ৩ |  |  |  |  |  |  |  |  |

Working Day 3 (Tuesday):

কাজের দিন ৩ (মঙ্গলবার)

| Trip<br>ভ্রমণ<br>ন | Trip<br>Segment<br>(TS)<br>[if any]<br>ভ্রমণের<br>ভাগ (যদি<br>থাকে) | Origin<br>(Provide<br>detail<br>address)<br>যাত্রা শুরুর<br>জায়গা<br>(বিস্তারিত<br>ঠিকানা<br>প্রদান<br>করুন) | Destination<br>(Provide detail<br>address)<br>গন্তব্য<br>(বিস্তারিত<br>ঠিকানা<br>প্রদান<br>করুন) | Purpose <sup>1</sup><br>ভ্রমণের<br>উদ্দেশ্য | Mode <sup>2</sup><br>যান<br>বাহন | Distance<br>(km)<br>দূরত্ব<br>(কিমি.) | Duration<br>(minutes)<br>সময়কাল<br>(মিনিট) | Cost<br>(BDT)<br>খরচ<br>(টাকা) | Time <sup>3</sup><br>সময় |
|--------------------|---------------------------------------------------------------------|---------------------------------------------------------------------------------------------------------------|--------------------------------------------------------------------------------------------------|---------------------------------------------|----------------------------------|---------------------------------------|---------------------------------------------|--------------------------------|---------------------------|
| 1                  | TS 1<br>ভ্রমণ ভাগ ১                                                 |                                                                                                               |                                                                                                  |                                             |                                  |                                       |                                             |                                |                           |
|                    | TS 2<br>ভ্রমণ ভাগ ২                                                 |                                                                                                               |                                                                                                  |                                             |                                  |                                       |                                             |                                |                           |
|                    | TS 3<br>ভ্রমণ ভাগ ৩                                                 |                                                                                                               |                                                                                                  |                                             |                                  |                                       |                                             |                                |                           |
| 2                  | TS 1<br>ভ্রমণ ভাগ ১                                                 |                                                                                                               |                                                                                                  |                                             |                                  |                                       |                                             |                                |                           |
|                    | TS 2<br>ভ্রমণ ভাগ ২                                                 |                                                                                                               |                                                                                                  |                                             |                                  |                                       |                                             |                                |                           |
|                    | TS 3<br>ভ্রমণ ভাগ ৩                                                 |                                                                                                               |                                                                                                  |                                             |                                  |                                       |                                             |                                |                           |
| 3                  | TS 1<br>ভ্রমণ ভাগ ১                                                 |                                                                                                               |                                                                                                  |                                             |                                  |                                       |                                             |                                |                           |
|                    | TS 2<br>ভ্রমণ ভাগ ২                                                 |                                                                                                               |                                                                                                  |                                             |                                  |                                       |                                             |                                |                           |
|                    | TS 3                                                                |                                                                                                               |                                                                                                  |                                             |                                  |                                       |                                             |                                |                           |



|   |                     |  |  |  |  |  |  |  |  |
|---|---------------------|--|--|--|--|--|--|--|--|
|   | ভ্রমণ ভাগ ৩         |  |  |  |  |  |  |  |  |
| 4 | TS 1<br>ভ্রমণ ভাগ ১ |  |  |  |  |  |  |  |  |
|   | TS 2<br>ভ্রমণ ভাগ ২ |  |  |  |  |  |  |  |  |
|   | TS 3<br>ভ্রমণ ভাগ ৩ |  |  |  |  |  |  |  |  |
|   |                     |  |  |  |  |  |  |  |  |

Working Day 4 (Wednesday):

কাজের দিন ৪ (বুধবার)

| Trip<br>ভ্রমণ | Trip<br>Segment<br>(TS)<br>[if any]<br>ভ্রমণের<br>ভাগ (যদি<br>থাকে) | Origin<br>(Provide<br>detail<br>address)<br>যাএা শুরুর<br>জায়গা<br>(বিস্তারিত<br>ত ঠিকানা<br>প্রদান<br>করুন) | Destination<br>(Provide detail<br>address)<br>গন্তব্য<br>(বিস্তারিত<br>ঠিকানা প্রদান<br>করুন) | Purpose <sup>1</sup><br>ভ্রমণের<br>উদ্দেশ্য | Mode <sup>2</sup><br>যান<br>বাহন | Distance<br>(km)<br>দূরত্ব<br>(কিমি.) | Duration<br>(minutes)<br>সময়কাল<br>(মিনিট) | Cost<br>(BDT)<br>খরচ<br>(টাকা) | Time <sup>3</sup><br>সময় |
|---------------|---------------------------------------------------------------------|---------------------------------------------------------------------------------------------------------------|-----------------------------------------------------------------------------------------------|---------------------------------------------|----------------------------------|---------------------------------------|---------------------------------------------|--------------------------------|---------------------------|
| 1             | TS 1<br>ভ্রমণ ভাগ ১                                                 |                                                                                                               |                                                                                               |                                             |                                  |                                       |                                             |                                |                           |
|               | TS 2<br>ভ্রমণ ভাগ ২                                                 |                                                                                                               |                                                                                               |                                             |                                  |                                       |                                             |                                |                           |
|               | TS 3<br>ভ্রমণ ভাগ ৩                                                 |                                                                                                               |                                                                                               |                                             |                                  |                                       |                                             |                                |                           |
| 2             | TS 1<br>ভ্রমণ ভাগ ১                                                 |                                                                                                               |                                                                                               |                                             |                                  |                                       |                                             |                                |                           |
|               | TS 2<br>ভ্রমণ ভাগ ২                                                 |                                                                                                               |                                                                                               |                                             |                                  |                                       |                                             |                                |                           |
|               | TS 3<br>ভ্রমণ ভাগ ৩                                                 |                                                                                                               |                                                                                               |                                             |                                  |                                       |                                             |                                |                           |
| 3             | TS 1<br>ভ্রমণ ভাগ ১                                                 |                                                                                                               |                                                                                               |                                             |                                  |                                       |                                             |                                |                           |
|               | TS 2<br>ভ্রমণ ভাগ ২                                                 |                                                                                                               |                                                                                               |                                             |                                  |                                       |                                             |                                |                           |
|               | TS 3<br>ভ্রমণ ভাগ ৩                                                 |                                                                                                               |                                                                                               |                                             |                                  |                                       |                                             |                                |                           |
| 4             | TS 1<br>ভ্রমণ ভাগ ১                                                 |                                                                                                               |                                                                                               |                                             |                                  |                                       |                                             |                                |                           |
|               | TS 2<br>ভ্রমণ ভাগ ২                                                 |                                                                                                               |                                                                                               |                                             |                                  |                                       |                                             |                                |                           |

|  |                     |  |  |  |  |  |  |  |  |
|--|---------------------|--|--|--|--|--|--|--|--|
|  | TS 3<br>ভ্রমণ ভাগ ৩ |  |  |  |  |  |  |  |  |
|--|---------------------|--|--|--|--|--|--|--|--|

Working Day 5 (Thursday):

কাজের দিন ৫ (বৃহস্পতিবার)

| Trip<br>ভ্রমণ | Trip<br>Segment<br>(TS)<br>[if any]<br>ভ্রমণের<br>ভাগ (যদি<br>থাকে) | Origin<br>(Provide<br>detail<br>address)<br>যাত্রা শুরুর<br>জায়গা<br>(বিস্তারিত<br>ঠিকানা<br>প্রদান<br>করুন) | Destination<br>(Provide detail<br>address)<br>গন্তব্য<br>(বিস্তারিত<br>ঠিকানা<br>প্রদান<br>করুন) | Purpose <sup>1</sup><br>ভ্রমণের<br>উদ্দেশ্য | Mode <sup>2</sup><br>যান<br>বাহন | Distance<br>(km)<br>দূরত্ব<br>(কিমি.) | Duration<br>(minutes)<br>সময়কাল<br>(মিনিট) | Cost<br>(BDT)<br>খরচ<br>(টাকা) | Time <sup>3</sup><br>সময় |
|---------------|---------------------------------------------------------------------|---------------------------------------------------------------------------------------------------------------|--------------------------------------------------------------------------------------------------|---------------------------------------------|----------------------------------|---------------------------------------|---------------------------------------------|--------------------------------|---------------------------|
| 1             | TS 1<br>ভ্রমণ ভাগ ১                                                 |                                                                                                               |                                                                                                  |                                             |                                  |                                       |                                             |                                |                           |
|               | TS 2<br>ভ্রমণ ভাগ ২                                                 |                                                                                                               |                                                                                                  |                                             |                                  |                                       |                                             |                                |                           |
|               | TS 3<br>ভ্রমণ ভাগ ৩                                                 |                                                                                                               |                                                                                                  |                                             |                                  |                                       |                                             |                                |                           |
| 2             | TS 1<br>ভ্রমণ ভাগ ১                                                 |                                                                                                               |                                                                                                  |                                             |                                  |                                       |                                             |                                |                           |
|               | TS 2<br>ভ্রমণ ভাগ ২                                                 |                                                                                                               |                                                                                                  |                                             |                                  |                                       |                                             |                                |                           |
|               | TS 3<br>ভ্রমণ ভাগ ৩                                                 |                                                                                                               |                                                                                                  |                                             |                                  |                                       |                                             |                                |                           |
| 3             | TS 1<br>ভ্রমণ ভাগ ১                                                 |                                                                                                               |                                                                                                  |                                             |                                  |                                       |                                             |                                |                           |
|               | TS 2<br>ভ্রমণ ভাগ ২                                                 |                                                                                                               |                                                                                                  |                                             |                                  |                                       |                                             |                                |                           |
|               | TS 3<br>ভ্রমণ ভাগ ৩                                                 |                                                                                                               |                                                                                                  |                                             |                                  |                                       |                                             |                                |                           |
| 4             | TS 1<br>ভ্রমণ ভাগ ১                                                 |                                                                                                               |                                                                                                  |                                             |                                  |                                       |                                             |                                |                           |
|               | TS 2<br>ভ্রমণ ভাগ ২                                                 |                                                                                                               |                                                                                                  |                                             |                                  |                                       |                                             |                                |                           |
|               | TS 3<br>ভ্রমণ ভাগ ৩                                                 |                                                                                                               |                                                                                                  |                                             |                                  |                                       |                                             |                                |                           |

Weekend Day 1 (Friday):

ছুটির দিন ১ (শুক্রবার)

| Trip<br>ভ্রম<br>ন | Trip<br>Segment<br>(TS)<br>[if any]<br>ভ্রমণের<br>ভাগ (যদি<br>থাকে) | Origin<br>(Provide<br>detail<br>address)<br>যাত্রা শুরুর<br>জায়গা<br>(বিস্তারি<br>ত ঠিকানা<br>প্রদান<br>করুন) | Destination<br>(Provide detail<br>address)<br>গন্তব্য<br>(বিস্তারিত<br>ঠিকানা প্রদান<br>করুন) | Purpose <sup>1</sup><br>ভ্রমণের<br>উদ্দেশ্য | Mode <sup>2</sup><br>যান<br>বাহন | Distanc<br>e<br>(km)<br>দূরত্ব<br>(কিমি.) | Duration<br>(minutes)<br>সময়কাল<br>(মিনিট) | Cost<br>(BDT)<br>খরচ<br>(টাকা) | Time <sup>3</sup><br>সময় |
|-------------------|---------------------------------------------------------------------|----------------------------------------------------------------------------------------------------------------|-----------------------------------------------------------------------------------------------|---------------------------------------------|----------------------------------|-------------------------------------------|---------------------------------------------|--------------------------------|---------------------------|
| 1                 | TS 1<br>ভ্রমণ ভাগ ১                                                 |                                                                                                                |                                                                                               |                                             |                                  |                                           |                                             |                                |                           |
|                   | TS 2<br>ভ্রমণ ভাগ ২                                                 |                                                                                                                |                                                                                               |                                             |                                  |                                           |                                             |                                |                           |
|                   | TS 3<br>ভ্রমণ ভাগ ৩                                                 |                                                                                                                |                                                                                               |                                             |                                  |                                           |                                             |                                |                           |
| 2                 | TS 1<br>ভ্রমণ ভাগ ১                                                 |                                                                                                                |                                                                                               |                                             |                                  |                                           |                                             |                                |                           |
|                   | TS 2<br>ভ্রমণ ভাগ ২                                                 |                                                                                                                |                                                                                               |                                             |                                  |                                           |                                             |                                |                           |
|                   | TS 3<br>ভ্রমণ ভাগ ৩                                                 |                                                                                                                |                                                                                               |                                             |                                  |                                           |                                             |                                |                           |
| 3                 | TS 1<br>ভ্রমণ ভাগ ১                                                 |                                                                                                                |                                                                                               |                                             |                                  |                                           |                                             |                                |                           |
|                   | TS 2<br>ভ্রমণ ভাগ ২                                                 |                                                                                                                |                                                                                               |                                             |                                  |                                           |                                             |                                |                           |
|                   | TS 3<br>ভ্রমণ ভাগ ৩                                                 |                                                                                                                |                                                                                               |                                             |                                  |                                           |                                             |                                |                           |
| 4                 | TS 1<br>ভ্রমণ ভাগ ১                                                 |                                                                                                                |                                                                                               |                                             |                                  |                                           |                                             |                                |                           |
|                   | TS 2<br>ভ্রমণ ভাগ ২                                                 |                                                                                                                |                                                                                               |                                             |                                  |                                           |                                             |                                |                           |
|                   | TS 3<br>ভ্রমণ ভাগ ৩                                                 |                                                                                                                |                                                                                               |                                             |                                  |                                           |                                             |                                |                           |

Weekend Day 2 (Saturday):

ছুটির দিন ২ (শনিবার)

| Trip<br>ভ্রমণ | Trip<br>Segment<br>(TS)<br>[if any]<br>ভ্রমণের<br>ভাগ (যদি<br>থাকে) | Origin<br>(Provide<br>detail<br>address)<br>যাত্রা শুরুর<br>জায়গা<br>(বিস্তারিত<br>ঠিকানা<br>প্রদান<br>করুন) | Destination<br>(Provide detail<br>address)<br>গন্তব্য<br>(বিস্তারিত<br>ঠিকানা<br>প্রদান<br>করুন) | Purpose <sup>1</sup><br>ভ্রমণের<br>উদ্দেশ্য | Mode <sup>2</sup><br>যান<br>বাহন | Distance<br>(km)<br>দূরত্ব<br>(কিমি.) | Duration<br>(minutes)<br>সময়কাল<br>(মিনিট) | Cost<br>(BDT)<br>খরচ<br>(টাকা) | Time <sup>3</sup><br>সময় |
|---------------|---------------------------------------------------------------------|---------------------------------------------------------------------------------------------------------------|--------------------------------------------------------------------------------------------------|---------------------------------------------|----------------------------------|---------------------------------------|---------------------------------------------|--------------------------------|---------------------------|
| 1             | TS 1<br>ভ্রমণ ভাগ ১                                                 |                                                                                                               |                                                                                                  |                                             |                                  |                                       |                                             |                                |                           |
|               | TS 2<br>ভ্রমণ ভাগ ২                                                 |                                                                                                               |                                                                                                  |                                             |                                  |                                       |                                             |                                |                           |
|               | TS 3<br>ভ্রমণ ভাগ ৩                                                 |                                                                                                               |                                                                                                  |                                             |                                  |                                       |                                             |                                |                           |
| 2             | TS 1<br>ভ্রমণ ভাগ ১                                                 |                                                                                                               |                                                                                                  |                                             |                                  |                                       |                                             |                                |                           |
|               | TS 2<br>ভ্রমণ ভাগ ২                                                 |                                                                                                               |                                                                                                  |                                             |                                  |                                       |                                             |                                |                           |
|               | TS 3<br>ভ্রমণ ভাগ ৩                                                 |                                                                                                               |                                                                                                  |                                             |                                  |                                       |                                             |                                |                           |
| 3             | TS 1<br>ভ্রমণ ভাগ ১                                                 |                                                                                                               |                                                                                                  |                                             |                                  |                                       |                                             |                                |                           |
|               | TS 2<br>ভ্রমণ ভাগ ২                                                 |                                                                                                               |                                                                                                  |                                             |                                  |                                       |                                             |                                |                           |
|               | TS 3<br>ভ্রমণ ভাগ ৩                                                 |                                                                                                               |                                                                                                  |                                             |                                  |                                       |                                             |                                |                           |
| 4             | TS 1<br>ভ্রমণ ভাগ ১                                                 |                                                                                                               |                                                                                                  |                                             |                                  |                                       |                                             |                                |                           |
|               | TS 2<br>ভ্রমণ ভাগ ২                                                 |                                                                                                               |                                                                                                  |                                             |                                  |                                       |                                             |                                |                           |
|               | TS 3<br>ভ্রমণ ভাগ ৩                                                 |                                                                                                               |                                                                                                  |                                             |                                  |                                       |                                             |                                |                           |

<sup>1</sup>Purpose = 1: Home, 2: Work, 3: School, 4: Shopping Center/Store/Bazar, 5: Lunch/Dinner, 6: Social Contacts

<sup>2</sup>Mode = 1:On foot, 2:Bicycle, 3:Rickshaw, 4:Motorcycle, 5:Car, 6:Taxicab, 7:CNG Auto Rickshaw, 8:Jeep, 9:Microbus, 10:Bus, 11:Human Hauler, 12:Pickup

<sup>3</sup>Time = 1: 6am to 9am, 2: 9am to 12pm, 3: 12pm to 3pm, 4: 3pm to 6 pm, 5: 6pm to 9 pm, 6: 9pm to 12 am

## Instructions:

- Consider each trip you take during each day.
- Ignore walk trips with duration of less than 5 minutes.
- Consider trips you take for recreation or exercise also.
- Consider each trip mode as a separate trip segment (car, walk etc.) within a complete trip of one specific origin and destination.
- Maximum three trip segments are assumed for each trip. It can be more or less in number. Adjust accordingly in the travel log.
- Maximum four trips are assumed per day. It can be more or less in number. Adjust accordingly in the travel log.

## Sample filled up questionnaire of household 60 and travel logs of 2 members from the household

Scanned with Pre-Review

HOUSEHOLD SURVEY  
TRAVEL AND ACTIVITY STUDY  
IN DHAKA CITY, BANGLADESH  
Institute of Transportation Studies  
UNIVERSITY OF CALIFORNIA, IRVINE

Household ID: **060**  
This code will be assigned by the research team.

Name of the Surveyor: **Selima**

**PART A**  
General and Household Information

|                                                    |                                 |
|----------------------------------------------------|---------------------------------|
| 1. Name                                            | Shova Das                       |
| 2. Home Address (Give exact detail address)        | 60, 12/12/12, Dhaka, Bangladesh |
| 3. Contact number (Cell)                           | 01711111111                     |
| 4. Gender                                          | Male                            |
| 5. Age                                             | 3                               |
| 6. Educational attainment                          | 3                               |
| 7. Employment status                               | 1-Not employed                  |
| 8. Occupation                                      | 1-Not employed                  |
| 9. Monthly Income                                  | 5                               |
| 10. Household size                                 | 1-1                             |
| 11. Household employment                           | 1-1                             |
| 12. Study area                                     | 1-Dhaka                         |
| 13. Work Address (Give exact detail address)       | 1-Not employed                  |
| 14. Marital Status                                 | 1-Married                       |
| 15. Number of Children 4-14 years                  | 2                               |
| 16. Number of Children 15-17 years                 | 0                               |
| 17. Number of Children 18 years +                  | 0                               |
| 18. Number of Elderly above 65 years               | 0                               |
| 19. Do you own a private car?                      | 1-Yes                           |
| 20. How many cars does your family own for travel? | 1-1                             |
| 21. What other vehicles do you own?                | 1-Bicycle                       |
| 22. What is your preferred mode of travel?         | 1-Bicycle                       |

Scanned with Pre-Review

**PART B**  
General Travel Information (Weekday)

About Your Typical Weekday Travel  
Now think about your travel on a typical weekday (Sunday through Thursday). Please answer the following questions about how you travel to your work on a typical weekday.

On a typical weekday, I travel to work by (check all that apply):  
☒ Car  
☐ Bus  
☐ Train  
☐ Bicycle  
☐ Rickshaw  
☐ Walking  
☐ Taxi  
☐ Other (specify):

On a typical weekday, do you carpool to work with other people?  
☐ Yes  
☒ No

During a typical work week, do you work at home?  
☐ Yes  
☒ No

How many days per week do you usually work at home?  
☐ 1-1  
☐ 2-2  
☐ 3-3  
☐ 4-4  
☐ 5-5  
☐ 6-6  
☐ 7-7  
☐ 8-8  
☐ 9-9  
☐ 10-10  
☐ 11-11  
☐ 12-12  
☐ 13-13  
☐ 14-14  
☐ 15-15  
☐ 16-16  
☐ 17-17  
☐ 18-18  
☐ 19-19  
☐ 20-20  
☐ 21-21  
☐ 22-22  
☐ 23-23  
☐ 24-24  
☐ 25-25  
☐ 26-26  
☐ 27-27  
☐ 28-28  
☐ 29-29  
☐ 30-30  
☐ 31-31  
☐ 32-32  
☐ 33-33  
☐ 34-34  
☐ 35-35  
☐ 36-36  
☐ 37-37  
☐ 38-38  
☐ 39-39  
☐ 40-40  
☐ 41-41  
☐ 42-42  
☐ 43-43  
☐ 44-44  
☐ 45-45  
☐ 46-46  
☐ 47-47  
☐ 48-48  
☐ 49-49  
☐ 50-50  
☐ 51-51  
☐ 52-52  
☐ 53-53  
☐ 54-54  
☐ 55-55  
☐ 56-56  
☐ 57-57  
☐ 58-58  
☐ 59-59  
☐ 60-60  
☐ 61-61  
☐ 62-62  
☐ 63-63  
☐ 64-64  
☐ 65-65  
☐ 66-66  
☐ 67-67  
☐ 68-68  
☐ 69-69  
☐ 70-70  
☐ 71-71  
☐ 72-72  
☐ 73-73  
☐ 74-74  
☐ 75-75  
☐ 76-76  
☐ 77-77  
☐ 78-78  
☐ 79-79  
☐ 80-80  
☐ 81-81  
☐ 82-82  
☐ 83-83  
☐ 84-84  
☐ 85-85  
☐ 86-86  
☐ 87-87  
☐ 88-88  
☐ 89-89  
☐ 90-90  
☐ 91-91  
☐ 92-92  
☐ 93-93  
☐ 94-94  
☐ 95-95  
☐ 96-96  
☐ 97-97  
☐ 98-98  
☐ 99-99  
☐ 100-100  
☐ 101-101  
☐ 102-102  
☐ 103-103  
☐ 104-104  
☐ 105-105  
☐ 106-106  
☐ 107-107  
☐ 108-108  
☐ 109-109  
☐ 110-110  
☐ 111-111  
☐ 112-112  
☐ 113-113  
☐ 114-114  
☐ 115-115  
☐ 116-116  
☐ 117-117  
☐ 118-118  
☐ 119-119  
☐ 120-120  
☐ 121-121  
☐ 122-122  
☐ 123-123  
☐ 124-124  
☐ 125-125  
☐ 126-126  
☐ 127-127  
☐ 128-128  
☐ 129-129  
☐ 130-130  
☐ 131-131  
☐ 132-132  
☐ 133-133  
☐ 134-134  
☐ 135-135  
☐ 136-136  
☐ 137-137  
☐ 138-138  
☐ 139-139  
☐ 140-140  
☐ 141-141  
☐ 142-142  
☐ 143-143  
☐ 144-144  
☐ 145-145  
☐ 146-146  
☐ 147-147  
☐ 148-148  
☐ 149-149  
☐ 150-150  
☐ 151-151  
☐ 152-152  
☐ 153-153  
☐ 154-154  
☐ 155-155  
☐ 156-156  
☐ 157-157  
☐ 158-158  
☐ 159-159  
☐ 160-160  
☐ 161-161  
☐ 162-162  
☐ 163-163  
☐ 164-164  
☐ 165-165  
☐ 166-166  
☐ 167-167  
☐ 168-168  
☐ 169-169  
☐ 170-170  
☐ 171-171  
☐ 172-172  
☐ 173-173  
☐ 174-174  
☐ 175-175  
☐ 176-176  
☐ 177-177  
☐ 178-178  
☐ 179-179  
☐ 180-180  
☐ 181-181  
☐ 182-182  
☐ 183-183  
☐ 184-184  
☐ 185-185  
☐ 186-186  
☐ 187-187  
☐ 188-188  
☐ 189-189  
☐ 190-190  
☐ 191-191  
☐ 192-192  
☐ 193-193  
☐ 194-194  
☐ 195-195  
☐ 196-196  
☐ 197-197  
☐ 198-198  
☐ 199-199  
☐ 200-200  
☐ 201-201  
☐ 202-202  
☐ 203-203  
☐ 204-204  
☐ 205-205  
☐ 206-206  
☐ 207-207  
☐ 208-208  
☐ 209-209  
☐ 210-210  
☐ 211-211  
☐ 212-212  
☐ 213-213  
☐ 214-214  
☐ 215-215  
☐ 216-216  
☐ 217-217  
☐ 218-218  
☐ 219-219  
☐ 220-220  
☐ 221-221  
☐ 222-222  
☐ 223-223  
☐ 224-224  
☐ 225-225  
☐ 226-226  
☐ 227-227  
☐ 228-228  
☐ 229-229  
☐ 230-230  
☐ 231-231  
☐ 232-232  
☐ 233-233  
☐ 234-234  
☐ 235-235  
☐ 236-236  
☐ 237-237  
☐ 238-238  
☐ 239-239  
☐ 240-240  
☐ 241-241  
☐ 242-242  
☐ 243-243  
☐ 244-244  
☐ 245-245  
☐ 246-246  
☐ 247-247  
☐ 248-248  
☐ 249-249  
☐ 250-250  
☐ 251-251  
☐ 252-252  
☐ 253-253  
☐ 254-254  
☐ 255-255  
☐ 256-256  
☐ 257-257  
☐ 258-258  
☐ 259-259  
☐ 260-260  
☐ 261-261  
☐ 262-262  
☐ 263-263  
☐ 264-264  
☐ 265-265  
☐ 266-266  
☐ 267-267  
☐ 268-268  
☐ 269-269  
☐ 270-270  
☐ 271-271  
☐ 272-272  
☐ 273-273  
☐ 274-274  
☐ 275-275  
☐ 276-276  
☐ 277-277  
☐ 278-278  
☐ 279-279  
☐ 280-280  
☐ 281-281  
☐ 282-282  
☐ 283-283  
☐ 284-284  
☐ 285-285  
☐ 286-286  
☐ 287-287  
☐ 288-288  
☐ 289-289  
☐ 290-290  
☐ 291-291  
☐ 292-292  
☐ 293-293  
☐ 294-294  
☐ 295-295  
☐ 296-296  
☐ 297-297  
☐ 298-298  
☐ 299-299  
☐ 300-300  
☐ 301-301  
☐ 302-302  
☐ 303-303  
☐ 304-304  
☐ 305-305  
☐ 306-306  
☐ 307-307  
☐ 308-308  
☐ 309-309  
☐ 310-310  
☐ 311-311  
☐ 312-312  
☐ 313-313  
☐ 314-314  
☐ 315-315  
☐ 316-316  
☐ 317-317  
☐ 318-318  
☐ 319-319  
☐ 320-320  
☐ 321-321  
☐ 322-322  
☐ 323-323  
☐ 324-324  
☐ 325-325  
☐ 326-326  
☐ 327-327  
☐ 328-328  
☐ 329-329  
☐ 330-330  
☐ 331-331  
☐ 332-332  
☐ 333-333  
☐ 334-334  
☐ 335-335  
☐ 336-336  
☐ 337-337  
☐ 338-338  
☐ 339-339  
☐ 340-340  
☐ 341-341  
☐ 342-342  
☐ 343-343  
☐ 344-344  
☐ 345-345  
☐ 346-346  
☐ 347-347  
☐ 348-348  
☐ 349-349  
☐ 350-350  
☐ 351-351  
☐ 352-352  
☐ 353-353  
☐ 354-354  
☐ 355-355  
☐ 356-356  
☐ 357-357  
☐ 358-358  
☐ 359-359  
☐ 360-360  
☐ 361-361  
☐ 362-362  
☐ 363-363  
☐ 364-364  
☐ 365-365  
☐ 366-366  
☐ 367-367  
☐ 368-368  
☐ 369-369  
☐ 370-370  
☐ 371-371  
☐ 372-372  
☐ 373-373  
☐ 374-374  
☐ 375-375  
☐ 376-376  
☐ 377-377  
☐ 378-378  
☐ 379-379  
☐ 380-380  
☐ 381-381  
☐ 382-382  
☐ 383-383  
☐ 384-384  
☐ 385-385  
☐ 386-386  
☐ 387-387  
☐ 388-388  
☐ 389-389  
☐ 390-390  
☐ 391-391  
☐ 392-392  
☐ 393-393  
☐ 394-394  
☐ 395-395  
☐ 396-396  
☐ 397-397  
☐ 398-398  
☐ 399-399  
☐ 400-400  
☐ 401-401  
☐ 402-402  
☐ 403-403  
☐ 404-404  
☐ 405-405  
☐ 406-406  
☐ 407-407  
☐ 408-408  
☐ 409-409  
☐ 410-410  
☐ 411-411  
☐ 412-412  
☐ 413-413  
☐ 414-414  
☐ 415-415  
☐ 416-416  
☐ 417-417  
☐ 418-418  
☐ 419-419  
☐ 420-420  
☐ 421-421  
☐ 422-422  
☐ 423-423  
☐ 424-424  
☐ 425-425  
☐ 426-426  
☐ 427-427  
☐ 428-428  
☐ 429-429  
☐ 430-430  
☐ 431-431  
☐ 432-432  
☐ 433-433  
☐ 434-434  
☐ 435-435  
☐ 436-436  
☐ 437-437  
☐ 438-438  
☐ 439-439  
☐ 440-440  
☐ 441-441  
☐ 442-442  
☐ 443-443  
☐ 444-444  
☐ 445-445  
☐ 446-446  
☐ 447-447  
☐ 448-448  
☐ 449-449  
☐ 450-450  
☐ 451-451  
☐ 452-452  
☐ 453-453  
☐ 454-454  
☐ 455-455  
☐ 456-456  
☐ 457-457  
☐ 458-458  
☐ 459-459  
☐ 460-460  
☐ 461-461  
☐ 462-462  
☐ 463-463  
☐ 464-464  
☐ 465-465  
☐ 466-466  
☐ 467-467  
☐ 468-468  
☐ 469-469  
☐ 470-470  
☐ 471-471  
☐ 472-472  
☐ 473-473  
☐ 474-474  
☐ 475-475  
☐ 476-476  
☐ 477-477  
☐ 478-478  
☐ 479-479  
☐ 480-480  
☐ 481-481  
☐ 482-482  
☐ 483-483  
☐ 484-484  
☐ 485-485  
☐ 486-486  
☐ 487-487  
☐ 488-488  
☐ 489-489  
☐ 490-490  
☐ 491-491  
☐ 492-492  
☐ 493-493  
☐ 494-494  
☐ 495-495  
☐ 496-496  
☐ 497-497  
☐ 498-498  
☐ 499-499  
☐ 500-500  
☐ 501-501  
☐ 502-502  
☐ 503-503  
☐ 504-504  
☐ 505-505  
☐ 506-506  
☐ 507-507  
☐ 508-508  
☐ 509-509  
☐ 510-510  
☐ 511-511  
☐ 512-512  
☐ 513-513  
☐ 514-514  
☐ 515-515  
☐ 516-516  
☐ 517-517  
☐ 518-518  
☐ 519-519  
☐ 520-520  
☐ 521-521  
☐ 522-522  
☐ 523-523  
☐ 524-524  
☐ 525-525  
☐ 526-526  
☐ 527-527  
☐ 528-528  
☐ 529-529  
☐ 530-530  
☐ 531-531  
☐ 532-532  
☐ 533-533  
☐ 534-534  
☐ 535-535  
☐ 536-536  
☐ 537-537  
☐ 538-538  
☐ 539-539  
☐ 540-540  
☐ 541-541  
☐ 542-542  
☐ 543-543  
☐ 544-544  
☐ 545-545  
☐ 546-546  
☐ 547-547  
☐ 548-548  
☐ 549-549  
☐ 550-550  
☐ 551-551  
☐ 552-552  
☐ 553-553  
☐ 554-554  
☐ 555-555  
☐ 556-556  
☐ 557-557  
☐ 558-558  
☐ 559-559  
☐ 560-560  
☐ 561-561  
☐ 562-562  
☐ 563-563  
☐ 564-564  
☐ 565-565  
☐ 566-566  
☐ 567-567  
☐ 568-568  
☐ 569-569  
☐ 570-570  
☐ 571-571  
☐ 572-572  
☐ 573-573  
☐ 574-574  
☐ 575-575  
☐ 576-576  
☐ 577-577  
☐ 578-578  
☐ 579-579  
☐ 580-580  
☐ 581-581  
☐ 582-582  
☐ 583-583  
☐ 584-584  
☐ 585-585  
☐ 586-586  
☐ 587-587  
☐ 588-588  
☐ 589-589  
☐ 590-590  
☐ 591-591  
☐ 592-592  
☐ 593-593  
☐ 594-594  
☐ 595-595  
☐ 596-596  
☐ 597-597  
☐ 598-598  
☐ 599-599  
☐ 600-600  
☐ 601-601  
☐ 602-602  
☐ 603-603  
☐ 604-604  
☐ 605-605  
☐ 606-606  
☐ 607-607  
☐ 608-608  
☐ 609-609  
☐ 610-610  
☐ 611-611  
☐ 612-612  
☐ 613-613  
☐ 614-614  
☐ 615-615  
☐ 616-616  
☐ 617-617  
☐ 618-618  
☐ 619-619  
☐ 620-620  
☐ 621-621  
☐ 622-622  
☐ 623-623  
☐ 624-624  
☐ 625-625  
☐ 626-626  
☐ 627-627  
☐ 628-628  
☐ 629-629  
☐ 630-630  
☐ 631-631  
☐ 632-632  
☐ 633-633  
☐ 634-634  
☐ 635-635  
☐ 636-636  
☐ 637-637  
☐ 638-638  
☐ 639-639  
☐ 640-640  
☐ 641-641  
☐ 642-642  
☐ 643-643  
☐ 644-644  
☐ 645-645  
☐ 646-646  
☐ 647-647  
☐ 648-648  
☐ 649-649  
☐ 650-650  
☐ 651-651  
☐ 652-652  
☐ 653-653  
☐ 654-654  
☐ 655-655  
☐ 656-656  
☐ 657-657  
☐ 658-658  
☐ 659-659  
☐ 660-660  
☐ 661-661  
☐ 662-662  
☐ 663-663  
☐ 664-664  
☐ 665-665  
☐ 666-666  
☐ 667-667  
☐ 668-668  
☐ 669-669  
☐ 670-670  
☐ 671-671  
☐ 672-672  
☐ 673-673  
☐ 674-674  
☐ 675-675  
☐ 676-676  
☐ 677-677  
☐ 678-678  
☐ 679-679  
☐ 680-680  
☐ 681-681  
☐ 682-682  
☐ 683-683  
☐ 684-684  
☐ 685-685  
☐ 686-686  
☐ 687-687  
☐ 688-688  
☐ 689-689  
☐ 690-690  
☐ 691-691  
☐ 692-692  
☐ 693-693  
☐ 694-694  
☐ 695-695  
☐ 696-696  
☐ 697-697  
☐ 698-698  
☐ 699-699  
☐ 700-
